# Supplementary material for: Iodine-catalyzed thioallylation of indoles using Bunte salts prepared from Baylis–Hillman bromides
Source: Royal Society of Chemistry journal article supplement (doi:10.1039/d1ob00377a), 2021-01-01

## Electronic supplementary information

### Iodine-catalyzed thioallylation of indoles using Bunte salts prepared from Baylis-Hillman bromides

Prince Kumar Gupta, Arvind Kumar Yadav, Anup Kumar Sharma and Krishna Nand Singh\*

Department of Chemistry, Institute of Science, Banaras Hindu University, Varanasi-221005,  
India

E-mail: knsinghbhu@yahoo.co.in; knsingh@bhu.ac.in

| <b>Contents</b>                                                                        | <b>Page No.</b> |
|----------------------------------------------------------------------------------------|-----------------|
| I. General Information                                                                 | 2               |
| II. General procedure for the synthesis of product <b>2</b>                            | 2-3             |
| III. General procedure for the synthesis of product <b>3</b>                           | 3               |
| IV. Spectral data of the product <b>2</b>                                              | 4               |
| V. Spectral data of the product <b>3</b>                                               | 4-11            |
| VI. References                                                                         | 12              |
| VII. Copies of <sup>1</sup> H and <sup>13</sup> C NMR spectra of the product <b>2</b>  | 13              |
| VIII. Copies of <sup>1</sup> H and <sup>13</sup> C NMR spectra of the product <b>3</b> | 14-36           |
| IX. Copy of the NOSEY spectrum of the product <b>3a</b>                                | 36              |

**I. General Information:** All the reagents were purchased from Sigma-Aldrich, Merck, and Alfa Aesar, and were used as such. Unless otherwise specified, solvents were purified by standard methods. All the reactions were carried out using oven-dried glassware. Organic solutions were concentrated under reduced pressure using a Buchi rotary evaporator. Thin-layer chromatography (TLC) was done using Merck Kieselgel 60GF254 plates (thickness 0.25 mm), and the crude products were purified by column chromatography using silica gel (Merck 100–200 mesh). Visualization of TLC was made using a 254 nm UV light.  $^1\text{H}$  &  $^{13}\text{C}$  Spectra were recorded on a 500 MHz JEOL ECZ 500R FTNMR spectrometer ( $^1\text{H}$  NMR at 500 MHz &  $^{13}\text{C}$  NMR at 125 MHz). Chemical shifts are reported in  $\delta$ /ppm (parts per million) using tetramethylsilane (TMS) as an internal reference.  $^1\text{H}$  NMR and  $^{13}\text{C}$  NMR chemical shifts are given in ppm with respect to the residual  $\text{CHCl}_3$  peak ( $\delta$  7.26 ppm) and  $\text{CDCl}_3$  peak ( $\delta$  77.00 ppm) respectively. High-resolution mass spectrometry (HRMS) was recorded on a SCIEX X500R QTOF (TOF-MS) system.

## **II. General procedure for the synthesis of Bunte salts 2:**

The preparation of the Bunte salts involves the following three steps:

**Step I: Preparation of Baylis-Hillman alcohols.**<sup>1</sup> A mixture of the aldehyde (10.0 mmol), acrylonitrile (10.5 mmol) and DABCO (50.0 mmol%) was stirred in a glass vessel at RT for 24-48 h. After completion of the reaction (monitored by TLC), the mixture was diluted with diethyl ether (25 mL) and then washed with 0.5 M HCl solution ( $3 \times 30$  mL). The organic phase was dried over anhydrous sodium sulphate, filtered and concentrated under reduced pressure to give the product, which was purified by silica gel column chromatography using a mixture of ethyl acetate-n-hexane (1.0:9.0) to give the Baylis-Hillman alcohol.

**Step II: Preparation of Baylis-Hillman bromides.**<sup>2</sup> To a solution of BH-alcohol (5.0 mmol) in DCM (15 mL) maintained at 0 °C, was added 48% HBr solution (10.0 mmol) drop wise. The resulting mixture was stirred for 10 min, followed by drop-wise addition of conc.  $\text{H}_2\text{SO}_4$  (10.0 mmol) at the same temperature. The contents were allowed to stir over night at RT. Upon completion of the reaction (TLC), the mixture was shaken with 25 mL aqueous saturated solution of  $\text{NaHCO}_3$ , and then extracted with  $\text{CH}_2\text{Cl}_2$  ( $3 \times 10$  mL). The combined organic phase was dried over anhydrous sodium sulfate, filtered, and concentrated under diminished pressure to afford the

crude product, which was purified by column chromatography using a mixture of ethyl acetate/n-hexane (0.5:9.5) to give the Baylis-Hillman bromides.

### **Step III: Preparation of Bunte Salts from Baylis-Hillman Bromides.<sup>3</sup>**

A mixture of Baylis-Hillman bromide (5.0 mmol, 1.0 equiv.), sodium thiosulfate pentahydrate (6.0 mmol, 1.2 equiv), water (7.5 mL) and methanol (15 mL) was stirred and heated at 50 °C for two hours. The contents were cooled to room temperature and then concentrated on a rotary evaporator under reduced pressure to remove the methanol and water. The residual solid was dissolved in methanol (40 mL), heated to 50 °C (most solid dissolves), and then filtered through Whatman filter paper with the help of a funnel to take out excess sodium thiosulfate and sodium bromide. The filtrate was concentrated under reduced pressure. Trituration of the residue with hexane followed by filtration and drying under vacuum at 50 °C gave the Bunte salt **2** as a white solid.

**III. General procedure for the synthesis of products 3:** A mixture of indole **1**, (1.0 mmol), Bunte salt **2**, (1.0 mmol), I<sub>2</sub> (20 mol %) and DMSO (1.5 mL) was stirred in open air at room temperature for 10 h. After completion of the reaction (monitored by TLC), the mixture was quenched with aqueous solution of sodium thiosulfate pentahydrate (5 mL), and then extracted by ethyl acetate (3 × 5 mL). The combined organic phase was dried over anhydrous sodium sulfate, filtered, concentrated under reduced pressure, and finally purified by silica gel column chromatography using ethyl acetate-n-hexane (1.0:9.0) as eluent to afford the clean product **3**. The structures of all the products were confirmed by <sup>1</sup>H & <sup>13</sup>C-NMR, NOSEY, and HRMS, with a representative single crystal X-ray analysis.

## Spectral data of a representative Bunte Salt prepared from Baylis-Hillman Bromide:

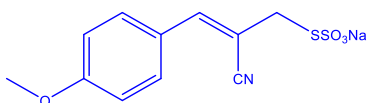

White solid;  $^1\text{H NMR}$  (500 MHz,  $\text{D}_2\text{O}$ ):  $\delta$  = 3.56 (s, 3H), 3.89 (s, 2H), 6.61 (d,  $J$  = 8.0 Hz, 2H), 6.90 (s, 1H), 7.36 (d,  $J$  = 8.5 Hz, 2H).  $^{13}\text{C NMR}$  (125 MHz,  $\text{D}_2\text{O}$ ):  $\delta$  = 39.7, 55.6, 102.9, 104.4, 119.1, 125.9, 130.5, 146.8, 161.0.

## Spectral data of the products 3:

### (*E*)-2-(((1*H*-Indol-3-yl)thio)methyl)-3-(*p*-tolyl)acrylonitrile (3a):

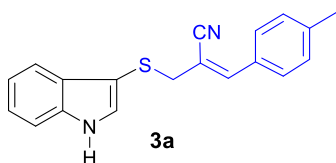

Reddish brown viscous liquid (90%, 274 mg);  $^1\text{H NMR}$  (500 MHz,  $\text{CDCl}_3$ ):  $\delta$  = 2.33 (s, 3H), 3.52 (s, 2H), 6.17 (s, 1H), 7.11 (d,  $J$  = 8.0 Hz, 2H), 7.21-7.25 (m, 3H), 7.33 (d,  $J$  = 8.5 Hz, 2H), 7.36 (d,  $J$  = 7.5 Hz, 1H), 7.79 (d,  $J$  = 7.5 Hz, 1H), 8.40 (brs, 1H).  $^{13}\text{C NMR}$  (125 MHz,  $\text{CDCl}_3$ ):  $\delta$  = 21.3, 41.5, 102.8, 106.7, 111.7, 118.5, 118.9, 120.7, 122.7, 128.4, 129.0, 129.3, 130.3, 131.4, 136.2, 140.6, 144.5. **HRMS (TOF MS):** ( $\text{M}+\text{H}$ )<sup>+</sup> calcd. for  $\text{C}_{19}\text{H}_{16}\text{N}_2\text{S}$ : 305.1107; found: 305.1110.

### (*E*)-2-(((2-Methyl-1*H*-indol-3-yl)thio)methyl)-3-(*p*-tolyl)acrylonitrile (3b):

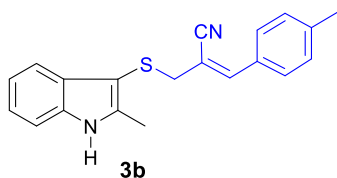

Reddish viscous liquid (94%, 299 mg);  $^1\text{H NMR}$  (500 MHz,  $\text{CDCl}_3$ ):  $\delta$  = 2.32 (s, 3H), 2.33 (s, 3H), 3.44 (s, 2H), 5.94 (s, 1H), 7.09 (d,  $J$  = 8.0 Hz, 2H), 7.15 (dd,  $J$  = 6.0 Hz,  $J$  = 3.0 Hz, 2H), 7.25-7.27 (m, 1H), 7.28 (d,  $J$  = 8.0 Hz, 2H), 7.66 (dd,  $J$  = 6.0 Hz,  $J$  = 3.0 Hz, 1H), 8.13 (brs, 1H).  $^{13}\text{C NMR}$  (125 MHz,  $\text{CDCl}_3$ ):  $\delta$  = 12.0, 21.4, 41.3, 99.7, 106.1, 110.8, 118.3, 118.6, 120.6, 122.0, 128.3, 129.4, 130.0, 130.6, 135.3, 140.5, 142.2, 144.0. **HRMS (TOF MS):** ( $\text{M}+\text{H}$ )<sup>+</sup> calcd. for  $\text{C}_{20}\text{H}_{18}\text{N}_2\text{S}$ : 319.1264; found: 319.1264.

**(E)-2-(((1-Methyl-1H-indol-3-yl)thio)methyl)-3-(p-tolyl)acrylonitrile (3c):**

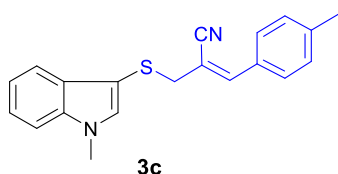

Reddish viscous liquid (88%, 280 mg);  $^1\text{H NMR}$  (500 MHz,  $\text{CDCl}_3$ ):  $\delta$  = 2.34 (s, 3H), 3.50 (s, 2H), 3.68 (s, 3H), 6.16 (s, 1H), 7.12 (s, 1H), 7.14 (d,  $J$  = 3.0 Hz, 2H), 7.19-7.22 (m, 1H), 7.25-7.29 (m, 1H), 7.31-7.35 (m, 3H), 7.76 (d,  $J$  = 7.5 Hz, 1H).  $^{13}\text{C NMR}$  (125 MHz,  $\text{CDCl}_3$ ):  $\delta$  = 21.4, 32.9, 41.9, 101.2, 106.9, 108.5, 109.7, 119.2, 120.4, 122.4, 128.4, 129.3, 129.7, 130.4, 135.8, 137.0, 140.5, 144.4. **HRMS (TOF MS):** ( $\text{M}+\text{H}$ )<sup>+</sup> calcd. For  $\text{C}_{20}\text{H}_{18}\text{N}_2\text{S}$ : 319.1264; found: 319.1264.

**(E)-2-(((5-Bromo-1H-indol-3-yl)thio)methyl)-3-(p-tolyl)acrylonitrile (3d):**

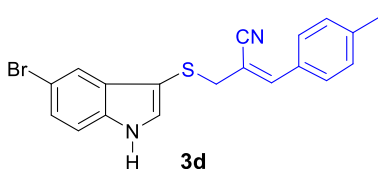

Brown solid (78%, 298 mg), mp 121-122 °C;  $^1\text{H NMR}$  (500 MHz,  $\text{CDCl}_3$ ):  $\delta$  = 2.34 (s, 3H), 3.51 (s, 2H), 6.21 (s, 1H), 7.13 (d,  $J$  = 8.0 Hz, 2H), 7.23-7.25 (m, 1H), 7.29-7.32 (m, 2H), 7.37 (d,  $J$  = 8.5 Hz, 2H), 7.90 (d,  $J$  = 1.5 Hz, 1H), 8.42 (brs, 1H).  $^{13}\text{C NMR}$  (125 MHz,  $\text{CDCl}_3$ ):  $\delta$  = 21.4, 41.6, 103.0, 106.7, 113.2, 114.4, 118.4, 121.7, 125.9, 128.5, 129.4, 130.3, 130.9, 132.5, 134.9, 140.8, 144.6. **HRMS (TOF MS):** ( $\text{M}+\text{H}$ )<sup>+</sup> calcd. for  $\text{C}_{19}\text{H}_{15}\text{N}_2\text{S}$ : 383.0212; found: 383.0217.

**(E)-2-(((2-Methyl-1H-indol-3-yl)thio)methyl)-3-phenylacrylonitrile (3e):**

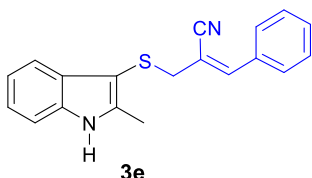

Reddish viscous liquid (95%, 289 mg);  $^1\text{H NMR}$  (500 MHz,  $\text{CDCl}_3$ ):  $\delta$  = 2.38 (s, 3H), 3.49 (s, 2H), 5.99 (s, 1H), 7.17 (d,  $J$  = 4.5 Hz, 1H), 7.19 (s, 1H), 7.28-7.33 (m, 4H), 7.39-7.40 (m, 2H), 7.67-7.69 (m, 1H), 8.10 (brs, 1H).  $^{13}\text{C NMR}$  (125 MHz,  $\text{CDCl}_3$ ):  $\delta$  = 12.1, 41.3, 99.8, 107.4, 110.7, 118.4, 120.7, 122.2, 128.4, 127.7, 130.0, 130.1, 133.3, 135.3, 142.2, 143.8. **HRMS (TOF MS):** ( $\text{M}+\text{H}$ )<sup>+</sup> calcd. for  $\text{C}_{19}\text{H}_{16}\text{N}_2\text{S}$ : 305.1107; found: 305.1110.

**(E)-3-Phenyl-2-(((2-phenyl-1H-indol-3-yl)thio)methyl)acrylonitrile (3f):**

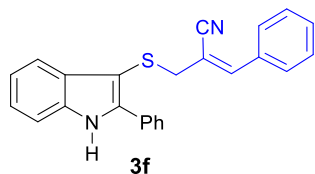

white solid (93%, 340 mg), mp 114-115 °C;  $^1\text{H NMR}$  (500 MHz,  $\text{CDCl}_3$ ):  $\delta$  = 3.42 (s, 2H), 6.0 (s, 1H), 7.12 (d,  $J$  = 7.5 Hz, 2H), 7.20-7.27 (m, 5H), 7.31-7.34 (m, 4H), 7.60-7.62 (m, 2H), 7.80-7.82 (m, 1H), 8.44 (brs, 1H).  $^{13}\text{C NMR}$  (125 MHz,  $\text{CDCl}_3$ ):  $\delta$  = 41.6, 100.0, 107.0, 111.3, 118.0, 119.3, 121.1, 123.2, 128.2, 128.4, 128.5, 128.5, 128.6, 129.9, 131.0, 131.1, 133.2, 135.5, 142.9, 143.8. **HRMS (TOF MS):** ( $\text{M}+\text{H}$ ) $^+$  calcd. for  $\text{C}_{24}\text{H}_{18}\text{N}_2\text{S}$ : 367.1264; found: 367.1267.

**(E)-2-(((5-Bromo-1H-indol-3-yl)thio)methyl)-3-phenylacrylonitrile (3g):**

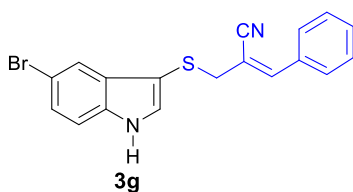

Brown viscous liquid (80%, 294 mg);  $^1\text{H NMR}$  (500 MHz,  $\text{CDCl}_3$ ):  $\delta$  = 3.51 (s, 2H), 6.24 (s, 1H), 7.23-7.33 (m, 6H), 7.44 (d,  $J$  = 7.5 Hz, 2H), 7.90 (s, 1H), 8.44 (brs, 1H).  $^{13}\text{C NMR}$  (125 MHz,  $\text{CDCl}_3$ ):  $\delta$  = 41.6, 102.9, 108.0, 113.2, 114.4, 118.2, 121.7, 125.9, 128.5, 128.7, 130.2, 130.9, 132.5, 133.0, 134.8, 144.6. **HRMS (TOF MS):** ( $\text{M}+\text{H}$ ) $^+$  calcd. for  $\text{C}_{18}\text{H}_{13}\text{BrN}_2\text{S}$ : 369.0056; found: 369.0057.

**(E)-2-(((1-Methyl-1H-indol-3-yl)thio)methyl)-3-phenylacrylonitrile (3h):**

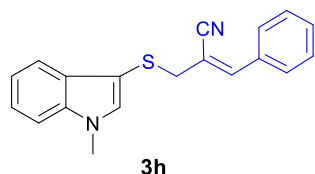

Brown solid (85%, 258 mg), mp 101-102 °C;  $^1\text{H NMR}$  (500 MHz,  $\text{CDCl}_3$ ):  $\delta$  = 3.50 (s, 2H), 3.67 (s, 3H), 6.17 (s, 1H), 7.14 (s, 1H), 7.18 (t,  $J$  = 7.0 Hz, 1H), 7.24-7.28 (m, 1H), 7.31-7.33 (m, 4H), 7.40-7.42 (m, 2H), 7.76 (d,  $J$  = 8.0 Hz, 1H).  $^{13}\text{C NMR}$  (125 MHz,  $\text{CDCl}_3$ ):  $\delta$  = 32.9, 41.8, 101.1, 108.2, 109.7, 118.3, 119.1, 120.5, 122.4, 128.4, 128.6, 129.7, 130.0, 133.1, 135.8, 137.3, 144.3. **HRMS (TOF MS):** ( $\text{M}+\text{H}$ ) $^+$  calcd. for  $\text{C}_{19}\text{H}_{16}\text{N}_2\text{S}$ : 305.1107; found: 305.1110.

**(E)-2-(((5-Methoxy-1H-indol-3-yl)thio)methyl)-3-phenylacrylonitrile (3i):**

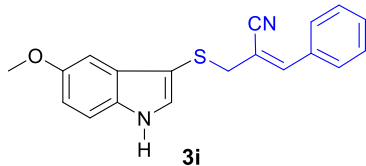

Reddish viscous liquid (80%, 256 mg); **<sup>1</sup>H NMR (500 MHz, CDCl<sub>3</sub>):**  $\delta$  = 3.52 (s, 2H), 3.82 (s, 3H), 6.20 (s, 1H), 6.86-6.88 (m, 2H), 7.12-7.15 (m, 1H), 7.20 (d,  $J$  = 2.5 Hz, 1H), 7.28 (d,  $J$  = 3.0 Hz, 1H), 7.31-7.34 (m, 2H), 7.40-7.41 (m, 2H), 8.26 (brs, 1H). **<sup>13</sup>C NMR (125 MHz, CDCl<sub>3</sub>):**  $\delta$  = 41.8, 55.7, 100.3, 102.7, 108.2, 112.5, 113.5, 118.4, 128.4, 128.7, 129.9, 130.1, 131.1, 131.9, 133.2, 144.4, 145.8, 155.2. **HRMS (TOF MS):** (M+H)<sup>+</sup> calcd. for C<sub>19</sub>H<sub>16</sub>N<sub>2</sub>OS: 321.1056; found: 321.1056.

**(E)-2-(((1H-Indol-3-yl)thio)methyl)-3-(4-methoxyphenyl)acrylonitrile (3j):**

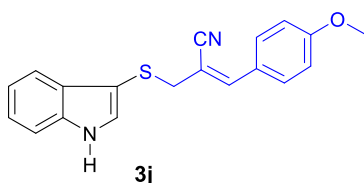

Reddish brown viscous liquid (93%, 298 mg); **<sup>1</sup>H NMR (500 MHz, CDCl<sub>3</sub>):**  $\delta$  = 3.49 (s, 2H), 3.76 (s, 3H), 6.11 (s, 1H), 6.78 (d,  $J$  = 8.5 Hz, 2H), 7.17-7.23 (m, 3H), 7.34-7.40 (m, 3H), 7.76 (d,  $J$  = 8.0 Hz, 1H), 8.40 (brs, 1H). **<sup>13</sup>C NMR (125 MHz, CDCl<sub>3</sub>):**  $\delta$  = 41.5, 55.3, 103.0, 104.9, 111.7, 114.0, 118.9, 120.7, 122.7, 125.8, 129.0, 130.2, 131.4, 136.2, 144.1, 160.9. **HRMS (TOF MS):** (M+H)<sup>+</sup> calcd. for C<sub>19</sub>H<sub>16</sub>N<sub>2</sub>OS: 321.1056; found: 321.1056.

**(E)-3-(4-Methoxyphenyl)-2-(((2-methyl-1H-indol-3-yl)thio)methyl)acrylonitrile (3k):**

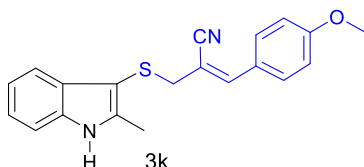

Reddish brown viscous liquid (95%, 317 mg); **<sup>1</sup>H NMR (500 MHz, CDCl<sub>3</sub>):**  $\delta$  = 2.34 (s, 3H), 3.44 (s, 2H), 3.78 (s, 3H), 5.90 (s, 1H), 6.80-6.82 (m, 2H), 7.15-7.17 (m, 2H), 7.26-7.27 (m, 1H), 7.36-7.39 (m, 2H), 7.66-7.68 (m, 1H), 8.15 (brs, 1H). **<sup>13</sup>C NMR (125 MHz, CDCl<sub>3</sub>):**  $\delta$  = 12.0, 41.4, 55.3, 99.7, 104.3, 114.1, 118.3, 118.9, 120.5, 122.0, 126.1, 130.0, 130.2, 135.3, 142.2, 143.6, 160.9. **HRMS (TOF MS):** (M+H)<sup>+</sup> calcd. for C<sub>20</sub>H<sub>18</sub>N<sub>2</sub>OS: 335.1213; found: 335.1223.

**(E)-2-(((5-Bromo-1H-indol-3-yl)thio)methyl)-3-(4-methoxyphenyl)acrylonitrile (3l):**

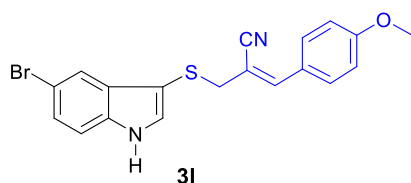

Brown viscous liquid (78%, 310 mg);  $^1\text{H NMR}$  (500 MHz,  $\text{CDCl}_3$ ):  $\delta$  = 3.50 (s, 2H), 3.81 (s, 3H), 6.18 (s, 1H), 6.83-6.89 (m, 2H), 7.24-7.26 (m, 1H), 7.30-7.32 (m, 2H), 7.45-7.47 (m, 2H), 7.90 (d,  $J$  = 1.5 Hz, 1H), 8.43 (brs, 1H).  $^{13}\text{C NMR}$  (125 MHz,  $\text{CDCl}_3$ ):  $\delta$  = 41.7, 55.4, 103.1, 104.9, 113.2, 114.1, 114.4, 118.7, 121.8, 125.7, 125.8, 130.4, 131.0, 132.5, 134.8, 144.2, 161.1. **HRMS (TOF MS):** ( $\text{M}+\text{H}$ ) $^+$  calcd. for  $\text{C}_{19}\text{H}_{15}\text{BrN}_2\text{OS}$ : 399.0161; found: 399.0172.

**(E)-3-(4-Methoxyphenyl)-2-(((1-methyl-1H-indol-3-yl)thio)methyl)acrylonitrile (3m):**

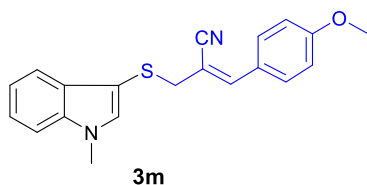

Light yellow viscous liquid (82%, 274 mg);  $^1\text{H NMR}$  (500 MHz,  $\text{CDCl}_3$ ):  $\delta$  = 3.49 (s, 2H), 3.67 (s, 3H), 3.80 (s, 3H), 6.12 (s, 1H), 6.82 (d,  $J$  = 8.5 Hz, 2H), 7.13 (s, 1H), 7.18 (t,  $J$  = 7.5 Hz, 1H), 7.24-7.32 (m, 2H), 7.42 (d,  $J$  = 8.5 Hz, 2H), 7.76 (d,  $J$  = 8.0 Hz, 1H).  $^{13}\text{C NMR}$  (125 MHz,  $\text{CDCl}_3$ ):  $\delta$  = 32.9, 41.9, 55.3, 101.3, 105.1, 109.7, 114.0, 118.8, 119.2, 120.4, 122.4, 125.9, 129.8, 130.3, 135.7, 137.3, 143.9, 161.0. **HRMS (TOF MS):** ( $\text{M}+\text{H}$ ) $^+$  calcd. for  $\text{C}_{20}\text{H}_{18}\text{N}_2\text{OS}$ : 335.1213, found: 335.1223.

**(E)-3-(4-Methoxyphenyl)-2-(((5-methyl-1H-indol-3-yl)thio)methyl)acrylonitrile (3n):**

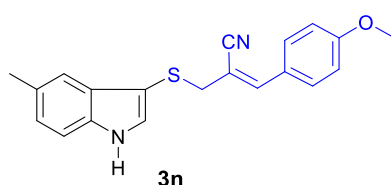

Reddish viscous liquid (75%, 251 mg);  $^1\text{H NMR}$  (500 MHz,  $\text{CDCl}_3$ ):  $\delta$  = 2.44 (s, 3H), 3.50 (s, 2H), 3.80 (s, 3H), 6.12 (s, 1H), 6.81-6.84 (m, 2H), 7.03 (d,  $J$  = 8.5 Hz, 1H), 7.23-7.26 (m, 2H), 7.42 (d,  $J$  = 9.0 Hz, 2H), 7.56 (s, 1H), 8.23 (brs, 1H).  $^{13}\text{C NMR}$  (125 MHz,  $\text{CDCl}_3$ ):  $\delta$  = 21.4, 41.7, 55.3, 102.6, 105.1, 111.3, 114.0, 118.7, 118.9, 124.4, 125.9, 130.2, 130.4, 131.4, 134.5, 144.0, 161.0. **HRMS (TOF MS):** ( $\text{M}+\text{H}$ ) $^+$  calcd. For  $\text{C}_{20}\text{H}_{18}\text{N}_2\text{OS}$ : 335.1213; found: 335.1223.



**(E)-2-(((5-Methoxy-1H-indol-3-yl)thio)methyl)-3-(4-methoxyphenyl)acrylonitrile (3o):**

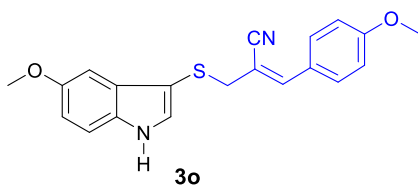

Brown viscous liquid (90%, 315 mg); <sup>1</sup>H NMR (500 MHz, CDCl<sub>3</sub>): δ = 3.48 (s, 2H), 3.77 (s, 3H), 3.81 (s, 3H), 6.13 (s, 1H), 6.79 (d, *J* = 9.0 Hz, 2H), 6.83-6.85 (m, 1H), 7.20-7.23 (m, 3H) 7.38 (d, *J* = 9.0 Hz, 2H), 8.42 (brs, 1H). <sup>13</sup>C NMR (125 MHz, CDCl<sub>3</sub>): δ = 41.8, 55.3, 55.7, 100.2, 102.6, 105.0, 112.5, 113.2, 114.0, 118.9, 125.8, 129.9, 130.2, 131.1, 131.9, 144.1, 154.9, 160.9. HRMS (TOF MS): (M+H)<sup>+</sup> calcd. for C<sub>20</sub>H<sub>18</sub>N<sub>2</sub>O<sub>2</sub>S: 351.1162; found: 351.1162.

**(E)-2-(((1H-Indol-3-yl)thio)methyl)-3-(4-chlorophenyl)acrylonitrile (3p):**

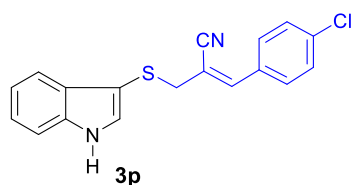

Yellow viscous liquid (85%, 275 mg); <sup>1</sup>H NMR (500 MHz, CDCl<sub>3</sub>): δ = 3.51 (s, 2H), 6.11 (s, 1H), 7.18-7.27 (m, 5H), 7.30 (d, *J* = 8.5 Hz, 2H), 7.36 (d, *J* = 8.0 Hz, 1H), 8.35 (brs, 1H). <sup>13</sup>C NMR (125 MHz, CDCl<sub>3</sub>): δ = 41.5, 103.0, 108.7, 111.7, 118.0, 119.0, 120.9, 122.9, 128.9, 129.0, 129.6, 131.3, 131.5, 136.0, 136.2, 142.9. HRMS (TOF MS): (M+H)<sup>+</sup> calcd. for C<sub>18</sub>H<sub>13</sub>ClN<sub>2</sub>S: 325.0561; found: 325.0567.

**(E)-3-(4-Chlorophenyl)-2-(((5-methyl-1H-indol-3-yl)thio)methyl)acrylonitrile (3q):**

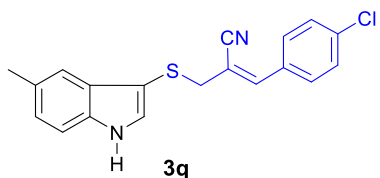

Reddish brown viscous liquid (73%, 247 mg); <sup>1</sup>H NMR (500 MHz, CDCl<sub>3</sub>): δ = 2.42 (s, 3H), 3.49 (s, 2H), 6.09 (s, 1H), 6.99-7.05 (m, 2H), 7.22 (d, *J* = 3.0 Hz, 1H), 7.24-7.26 (m, 2H), 7.29-7.32 (m, 2H), 7.52 (s, 1H), 8.29 (brs, 1H). <sup>13</sup>C NMR (125 MHz, CDCl<sub>3</sub>): δ = 21.4, 41.5, 102.3, 108.7, 111.4, 118.6, 124.5, 128.4, 128.8, 129.4, 129.6, 130.3, 131.4, 134.5, 135.9, 142.8, 144.2. HRMS (TOF MS): (M+H)<sup>+</sup> calcd. for C<sub>19</sub>H<sub>15</sub>ClN<sub>2</sub>S: 339.0717; found: 339.0726.

**(E)-3-(4-Chlorophenyl)-2-(((5-methoxy-1H-indol-3-yl)thio)methyl)acrylonitrile (3r):**

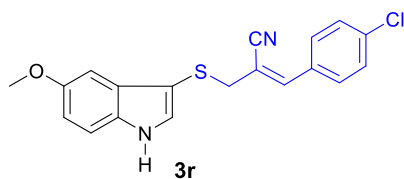

Light yellow viscous liquid (80%, 283 mg); <sup>1</sup>H NMR (500 MHz, CDCl<sub>3</sub>): δ = 3.49 (s, 2H), 3.81 (s, 3H), 6.10 (s, 1H), 6.85-6.86 (m, 1H), 7.01-7.05 (m, 1H), 7.18 (s, 1H), 7.23-7.24 (m, 3H), 7.27-7.29 (m, 2H), 8.43 (brs, 1H). <sup>13</sup>C NMR (125 MHz, CDCl<sub>3</sub>): δ = 41.7, 55.7, 100.2, 102.3, 108.6, 112.5, 113.2, 118.1, 128.4, 128.8, 129.6, 131.0, 131.5, 131.9, 135.9, 142.9, 155.0. HRMS (TOF MS): (M+H)<sup>+</sup> calcd. for C<sub>19</sub>H<sub>15</sub>N<sub>2</sub>ClOS: 355.0667; found: 355.0667.

**(E)-3-(4-Chlorophenyl)-2-(((2-methyl-1H-indol-3-yl)thio)methyl)acrylonitrile (3s):**

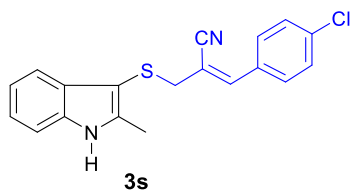

Reddish brown viscous liquid (89%, 301 mg); <sup>1</sup>H NMR (500 MHz, CDCl<sub>3</sub>): δ = 2.37 (s, 3H), 3.46 (s, 2H), 5.91 (s, 1H), 7.15-7.19 (m, 2H), 7.25-7.30 (m, 5H), 7.65-7.66 (m, 1H), 8.13 (brs, 1H). <sup>13</sup>C NMR (125 MHz, CDCl<sub>3</sub>): δ = 12.0, 41.2, 99.7, 108.0, 110.8, 118.1, 118.4, 120.7, 122.2, 129.0, 129.5, 130.0, 131.7, 135.3, 136.0, 140.1, 142.4. HRMS (TOF MS): (M+H)<sup>+</sup> calcd. for C<sub>19</sub>H<sub>15</sub>ClN<sub>2</sub>S: 339.0717; found: 339.0726.

**(E)-3-(4-Chlorophenyl)-2-(((7-methyl-1H-indol-3-yl)thio)methyl)acrylonitrile (3t):**

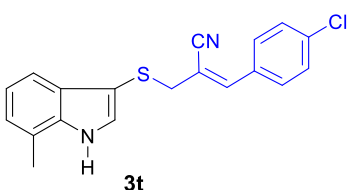

Brown viscous liquid (84%, 284 mg); <sup>1</sup>H NMR (500 MHz, CDCl<sub>3</sub>): δ = 2.46 (s, 3H), 3.52 (s, 2H), 6.13 (s, 1H), 7.03 (d, *J* = 7.0 Hz, 1H), 7.12 (t, *J* = 7.5 Hz, 1H), 7.25-7.27 (m, 3H), 7.32-7.37 (m, 2H), 7.60 (d, *J* = 7.5 Hz, 1H), 8.27 (brs, 1H). <sup>13</sup>C NMR (125 MHz, CDCl<sub>3</sub>): δ = 16.4, 41.4, 103.5, 108.8, 116.7, 118.0, 121.1, 123.5, 128.6, 128.9, 129.7, 130.3, 131.0, 131.5, 135.8, 136.0, 142.8. HRMS (TOF MS): (M+H)<sup>+</sup> calcd. for C<sub>19</sub>H<sub>15</sub>ClN<sub>2</sub>S: 339.0717; found: 339.0726.

**(E)-2-(((5-Bromo-1H-indol-3-yl)thio)methyl)-3-(4-chlorophenyl)acrylonitrile (3u):**

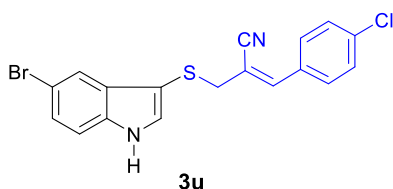

Brown solid (80%, 322 mg), 98-99 °C; <sup>1</sup>H NMR (500 MHz, CDCl<sub>3</sub>): δ = 3.50 (s, 2H), 6.18 (s, 1H), 7.23-7.30 (m, 5H), 7.35 (d, *J* = 8.0 Hz, 2H), 7.87 (s, 1H), 8.56 (brs, 1H). <sup>13</sup>C NMR (125 MHz, CDCl<sub>3</sub>): δ = 41.6, 102.7, 108.6, 113.3, 114.4, 117.9, 121.6, 125.9, 129.0, 129.7, 130.9, 131.3, 132.5, 134.8, 136.1, 143.1. HRMS (TOF MS): (M+H)<sup>+</sup> calcd. for C<sub>19</sub>H<sub>15</sub>BrClN<sub>2</sub>S: 402.9666; found: 402.9668.

**(E)-3-(4-Chlorophenyl)-2-(((2-phenyl-1H-indol-3-yl)thio)methyl)acrylonitrile (3v):**

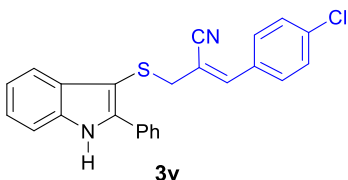

White solid (90%, 360 mg), mp 154-155 °C; <sup>1</sup>H NMR (500 MHz, CDCl<sub>3</sub>): δ = 3.43 (s, 2H), 5.91 (s, 1H), 7.04 (d, *J* = 8.0 Hz, 2H), 7.19-7.28 (m, 4H), 7.37 (d, *J* = 6.5 Hz, 4H), 7.64 (d, *J* = 6.0 Hz, 2H), 7.81 (d, *J* = 7.0 Hz, 1H), 8.46 (brs, 1H). <sup>13</sup>C NMR (125 MHz, CDCl<sub>3</sub>): δ = 41.6, 100.0, 107.7, 111.3, 117.7, 119.3, 121.2, 123.3, 128.2, 128.7, 129.7, 131.1, 131.6, 135.6, 135.8, 142.2, 142.9. HRMS (TOF MS): (M+H)<sup>+</sup> calcd. for C<sub>24</sub>H<sub>17</sub>ClN<sub>2</sub>S: 401.0874; found: 401.0868.

**(E)-2-(((1*H*-Indol-3-yl-1-*d*)thio)methyl)-3-(*p*-tolyl)acrylonitrile (3a):**

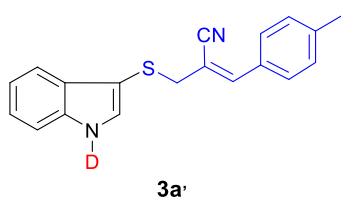

Reddish brown viscous liquid (90%, 274 mg); <sup>1</sup>H NMR (500 MHz, CDCl<sub>3</sub>): δ = 2.33 (s, 3H), 3.51 (s, 2H), 6.17 (s, 1H), 7.11 (d, *J* = 7.5 Hz, 2H), 7.21-7.24 (m, 3H), 7.33-7.37 (m, 3H), 7.79 (d, *J* = 7.5 Hz, 1H).

## References:

- 1) A. K. Yadav, A. K. Sharma and K. N. Singh, *Org. Chem. Front.*, 2019, **6**, 987-993.
- 2) (a) D. Basavaiah, A. J. Rao and T. Satyanarayana, *Chem. Rev.*, 2003, **103**, 811-891; (b) D. Yadav, S. K. Sharma and R. S. Menon, *Org. Biomol. Chem.*, 2019, **17**, 4073-4076.
- 3) (a) J. T. Reeves, K. Camara, Z. S. Han, Y. Xu, H. Lee, C. A. Busacca, Chris H. *Org. Lett.*, 2014, **16**, 1196–1199; (b) H. Distler, *Angew. Chem. Int. Ed.*, 1967, **6**, 544-553.

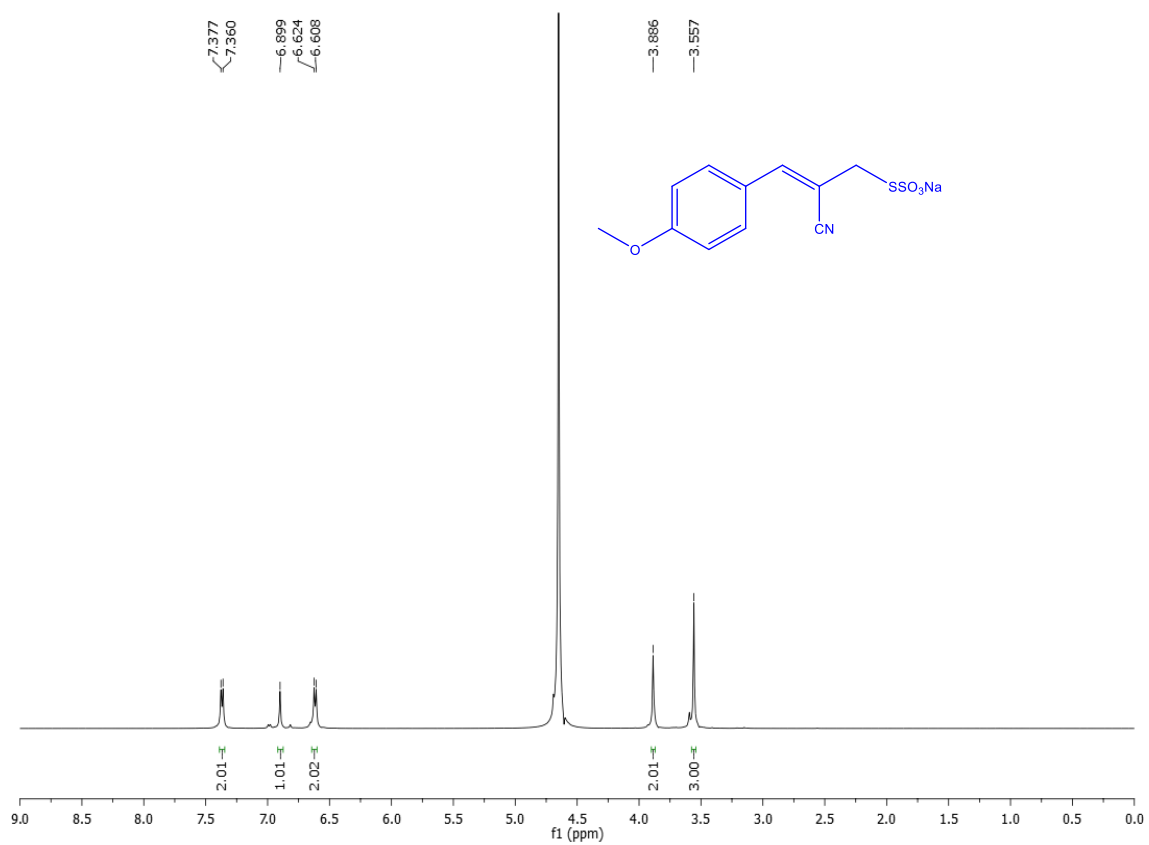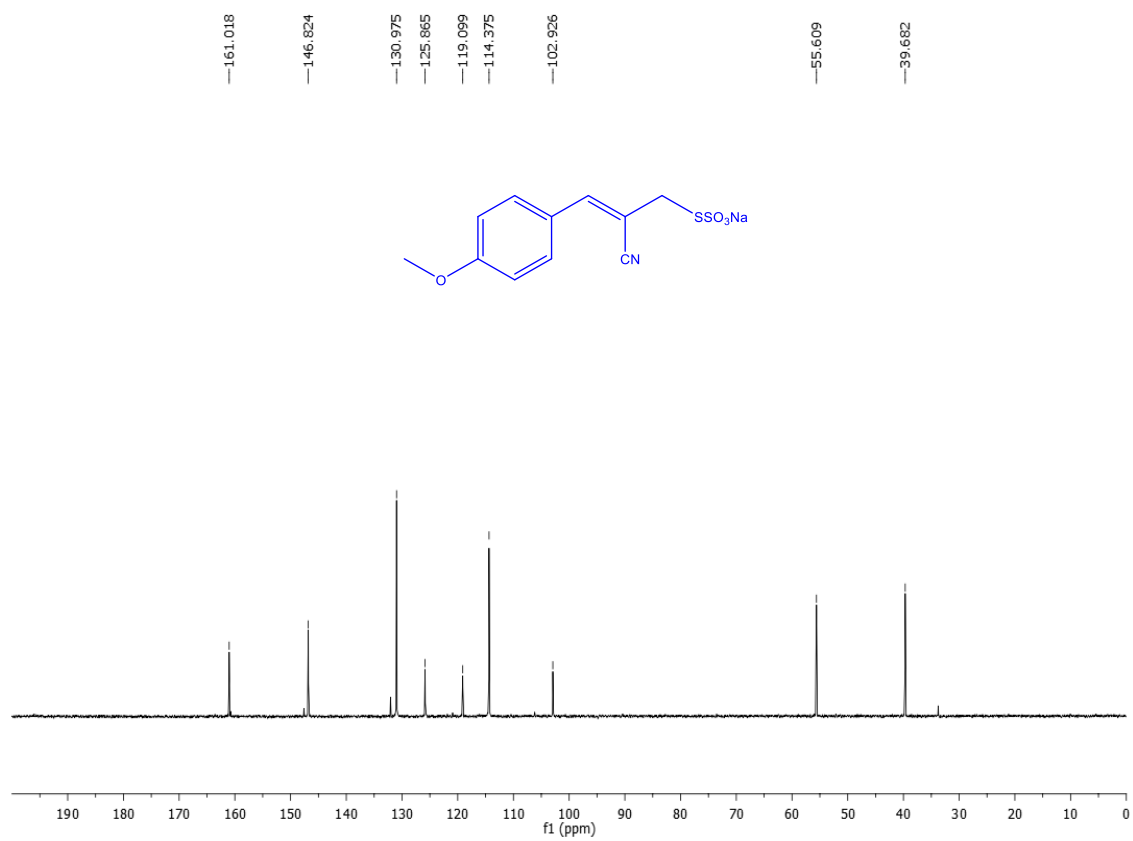

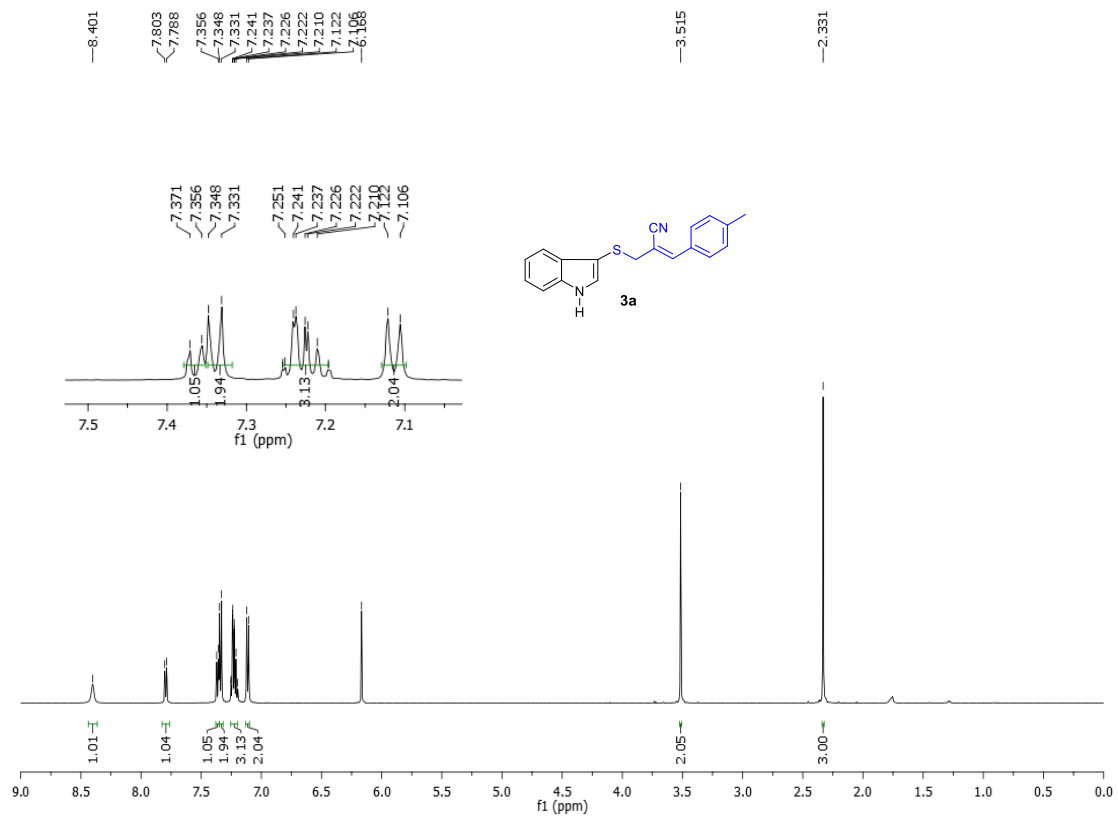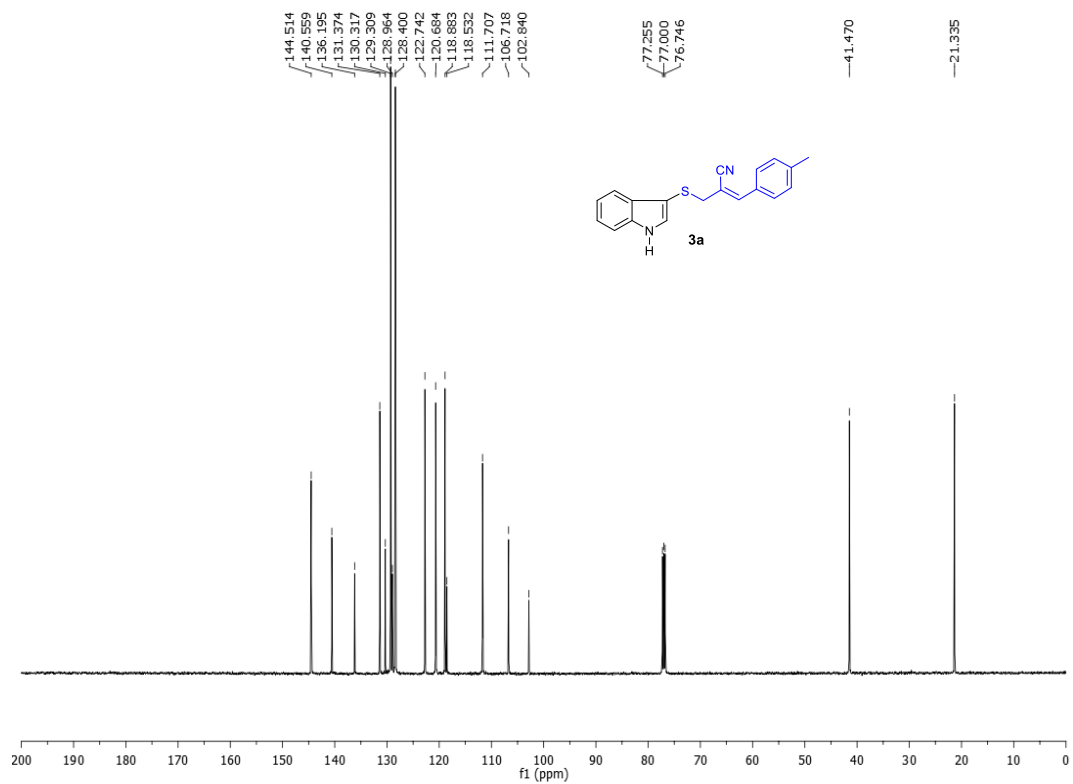

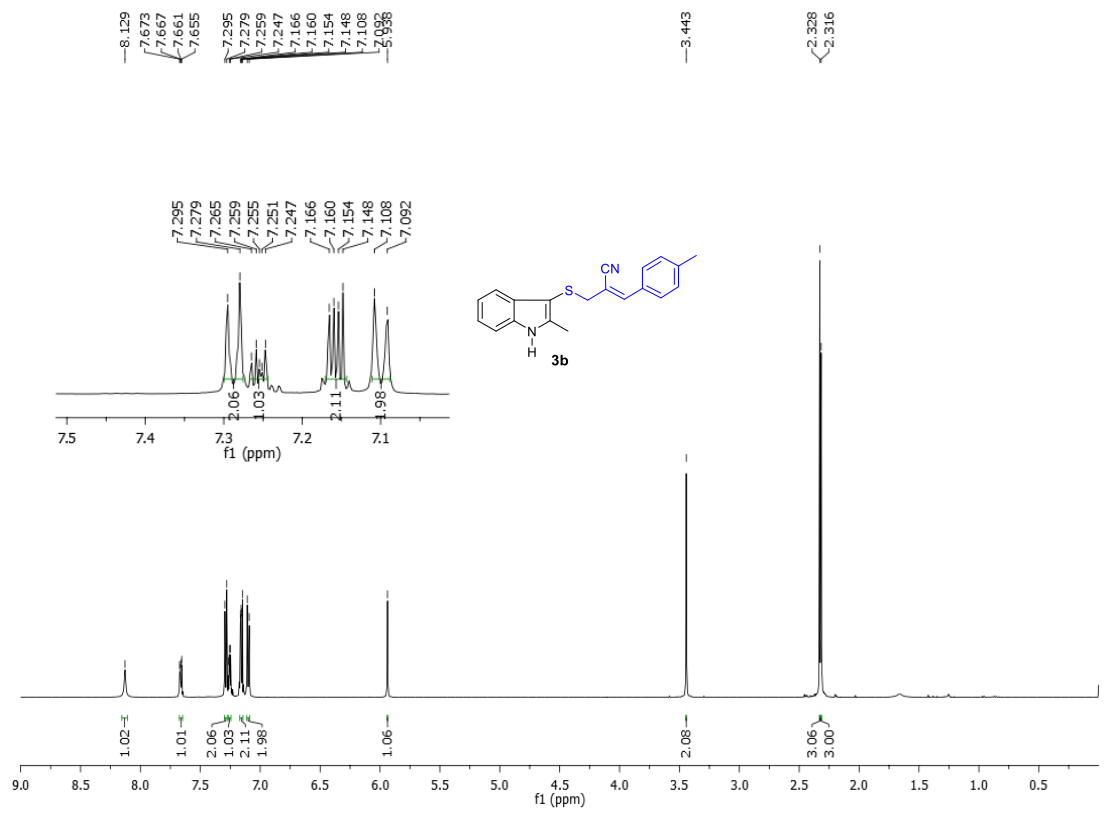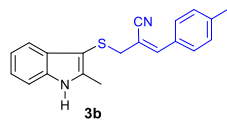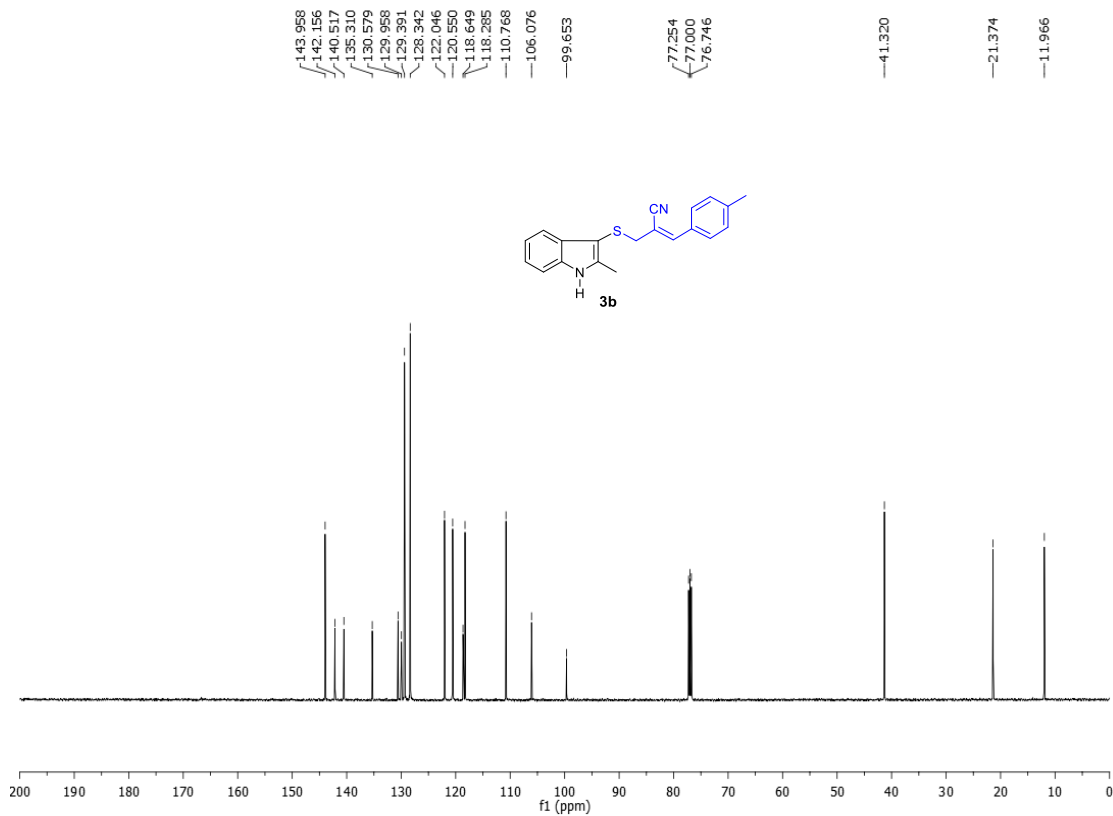

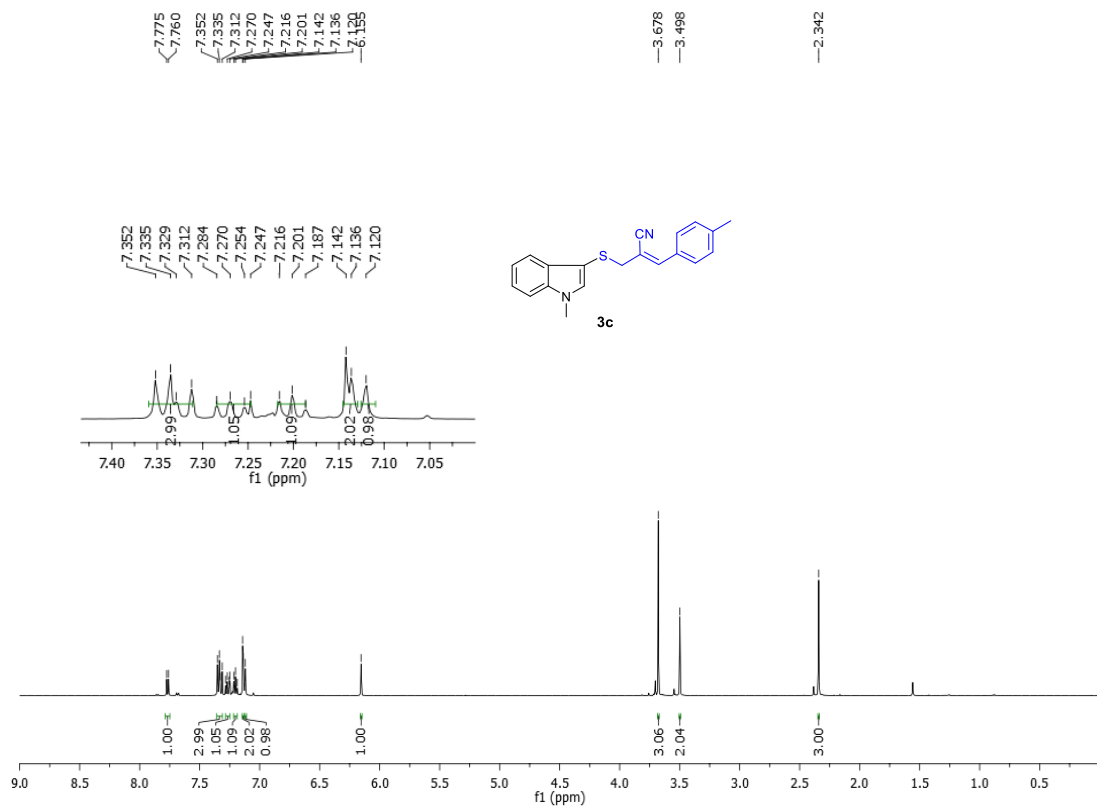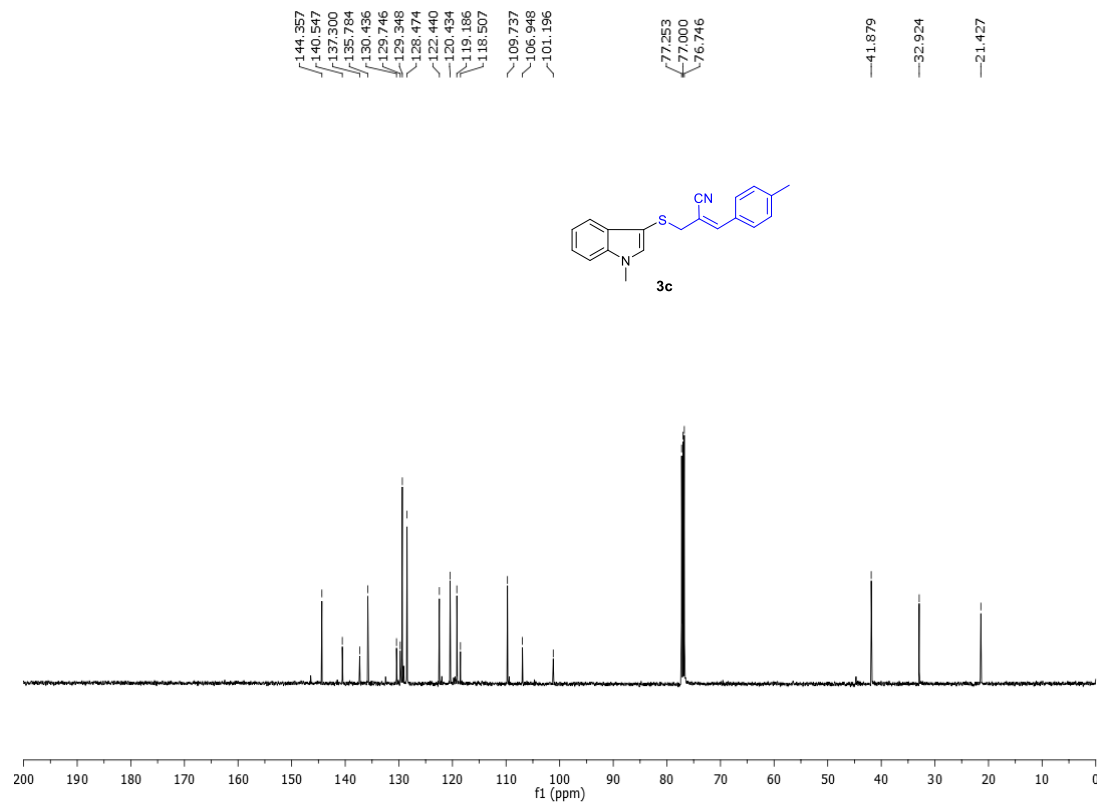



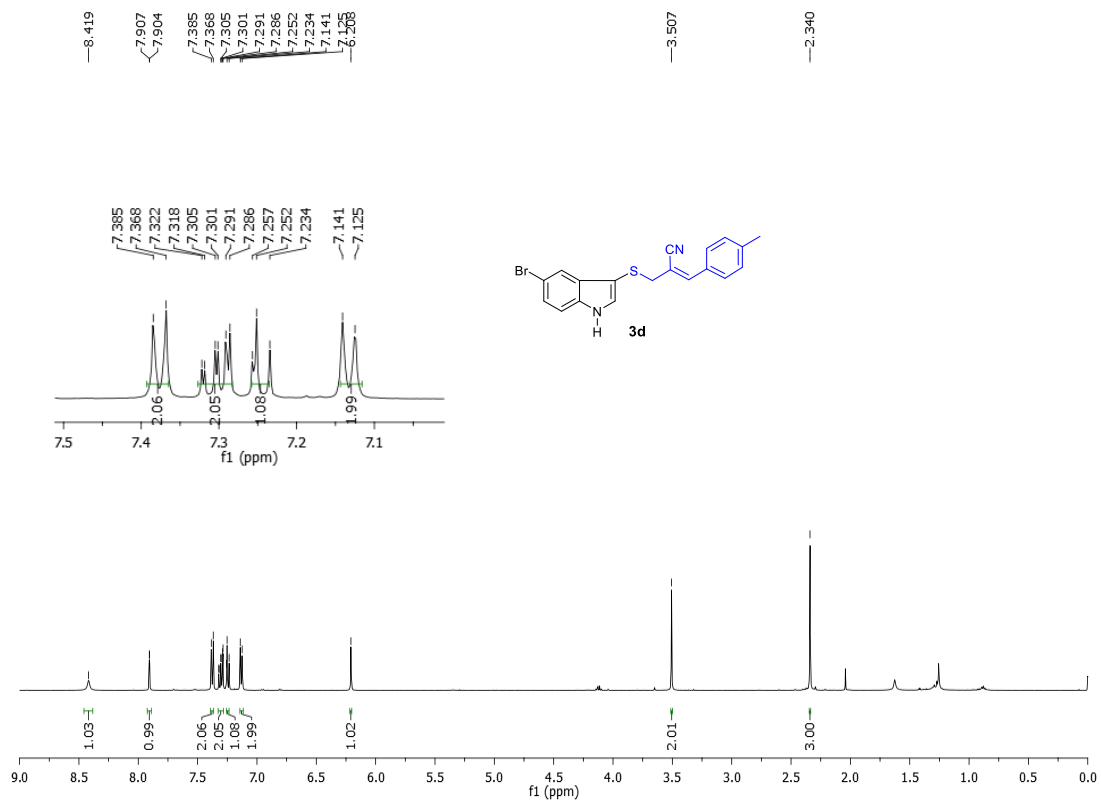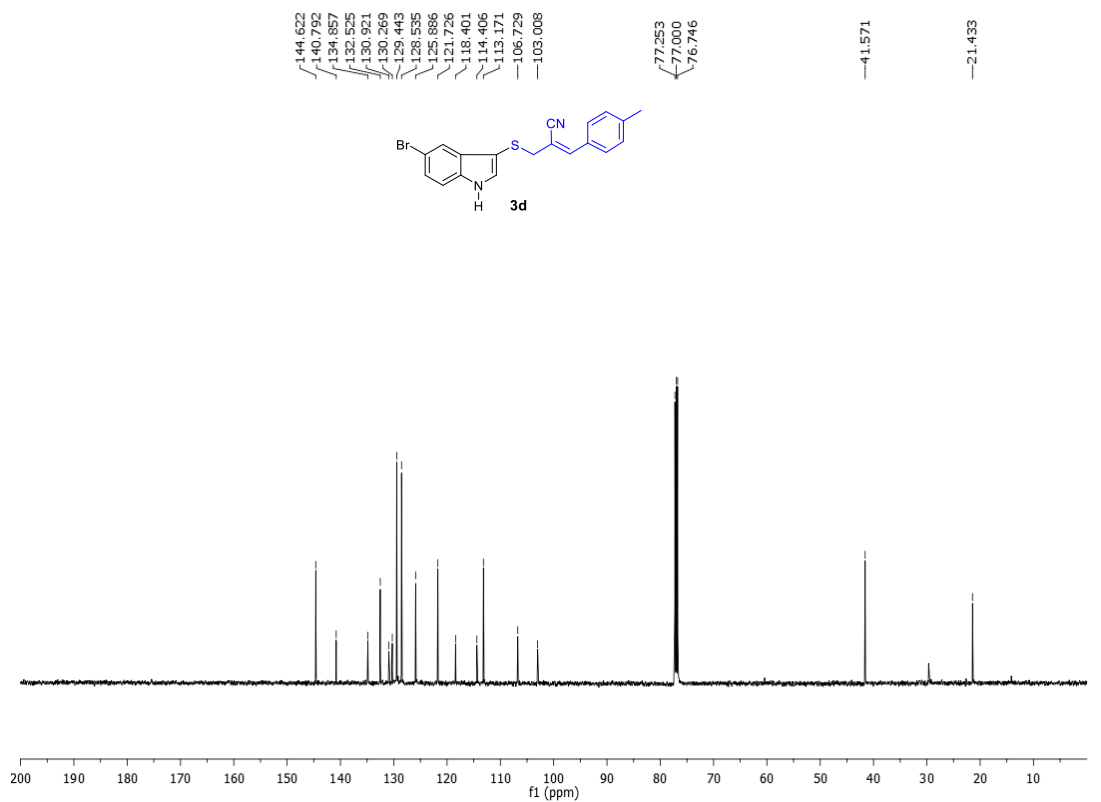

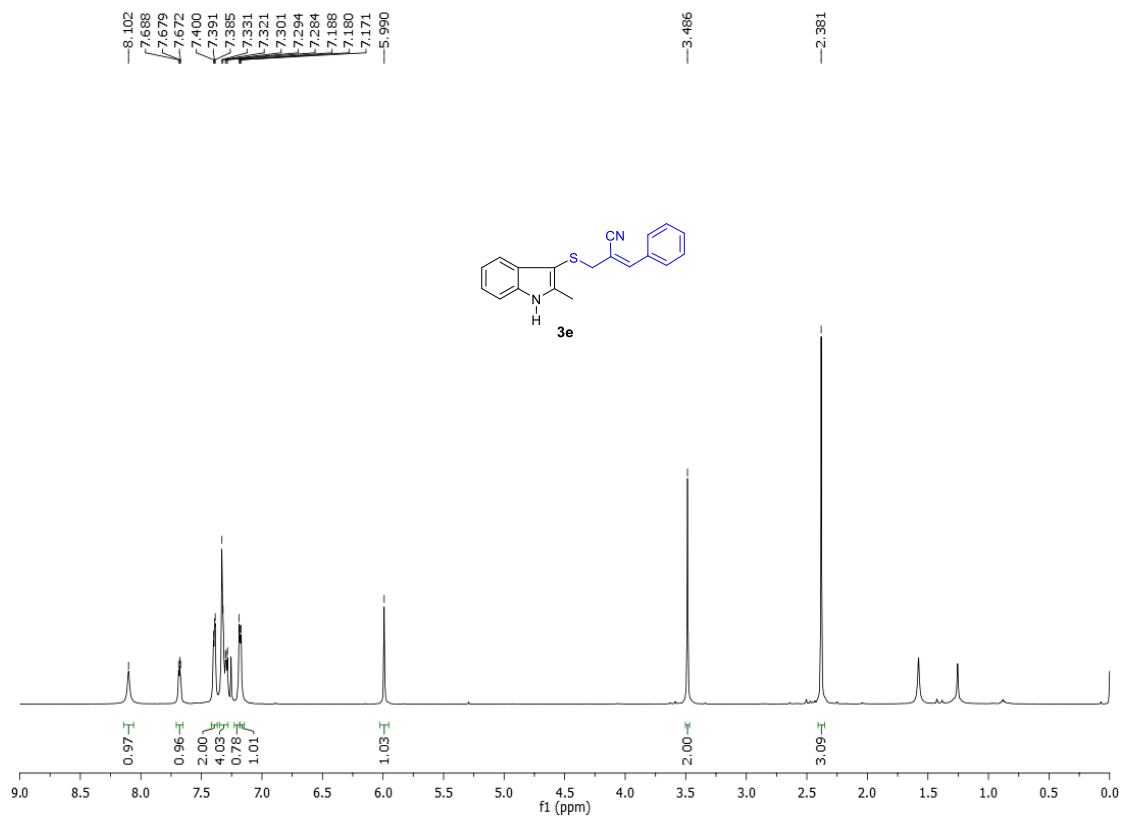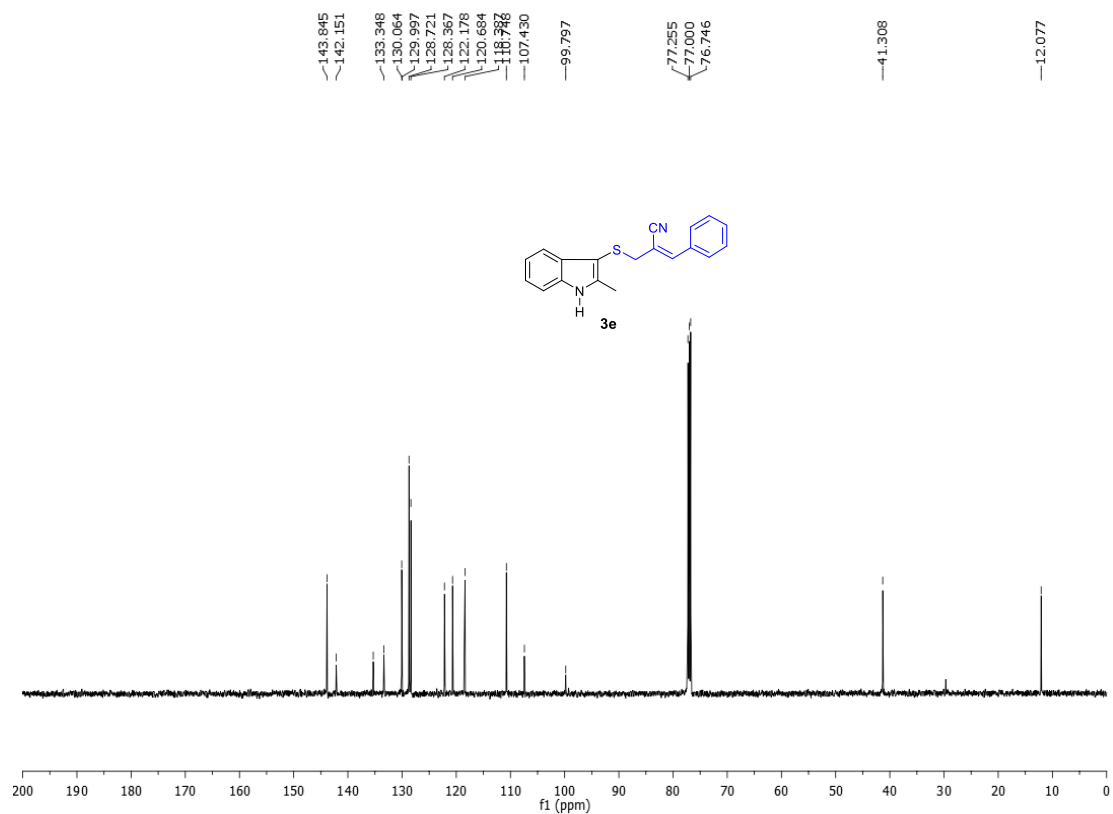

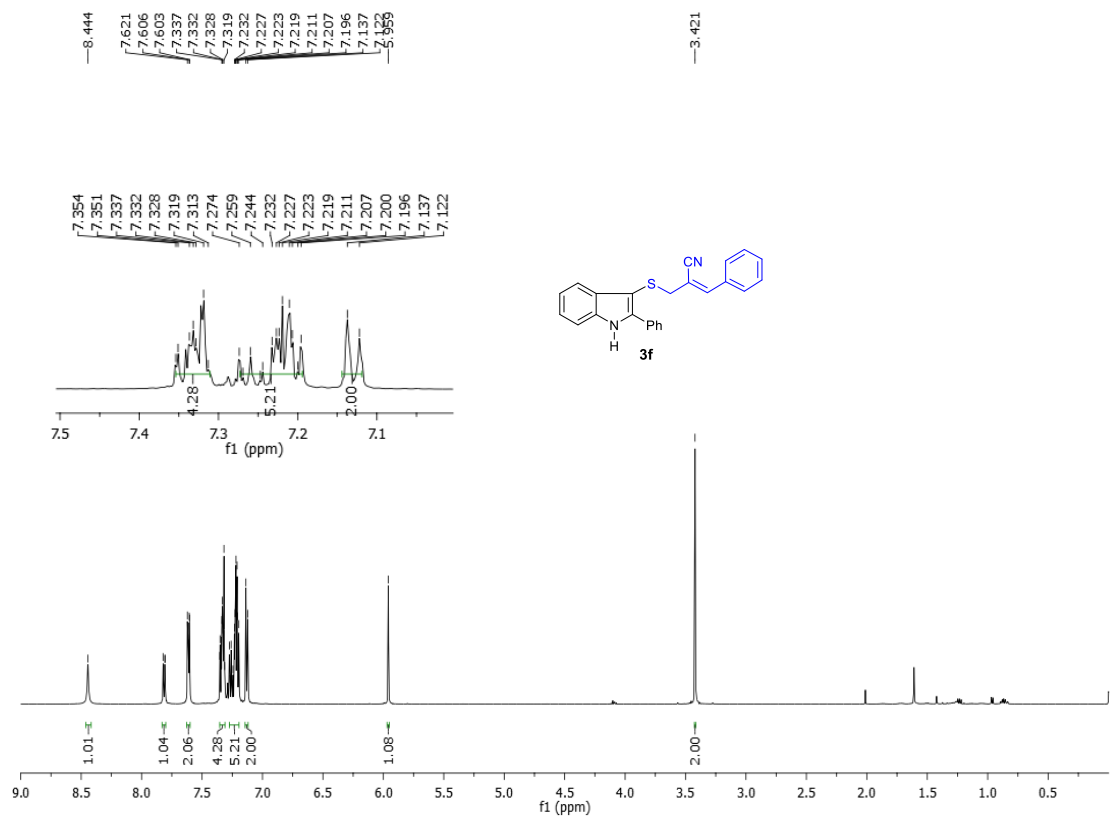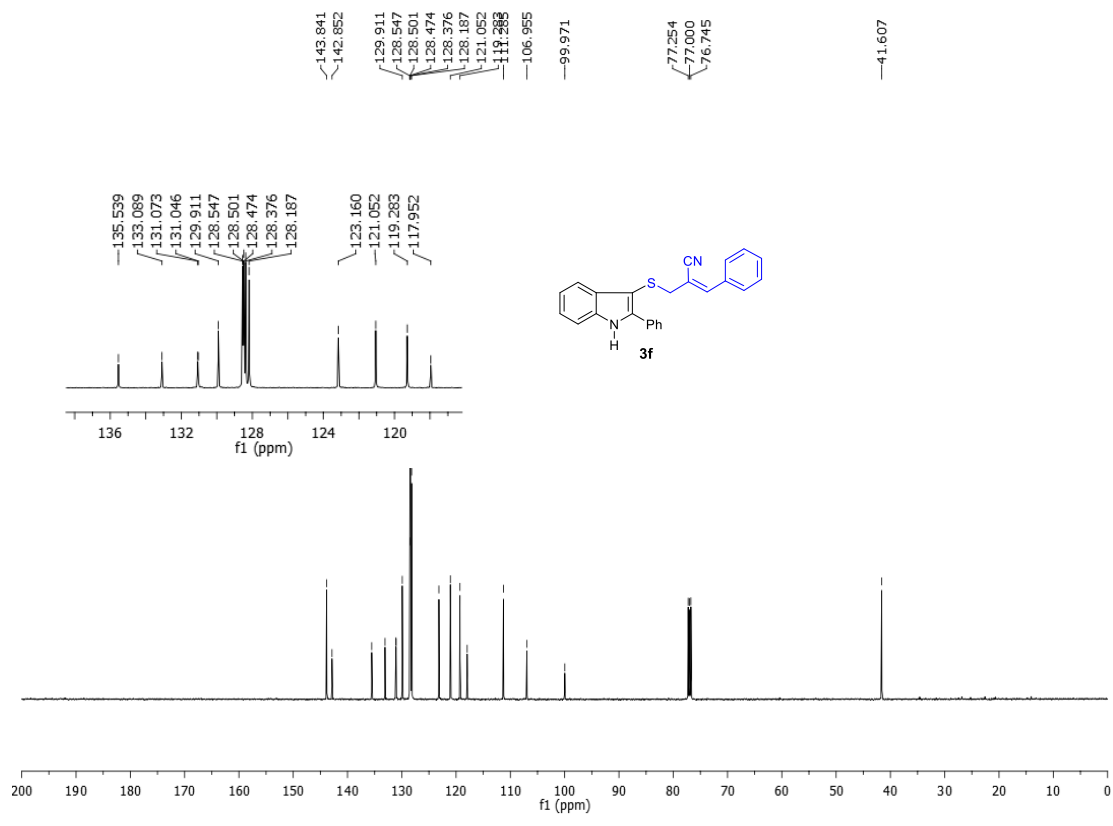

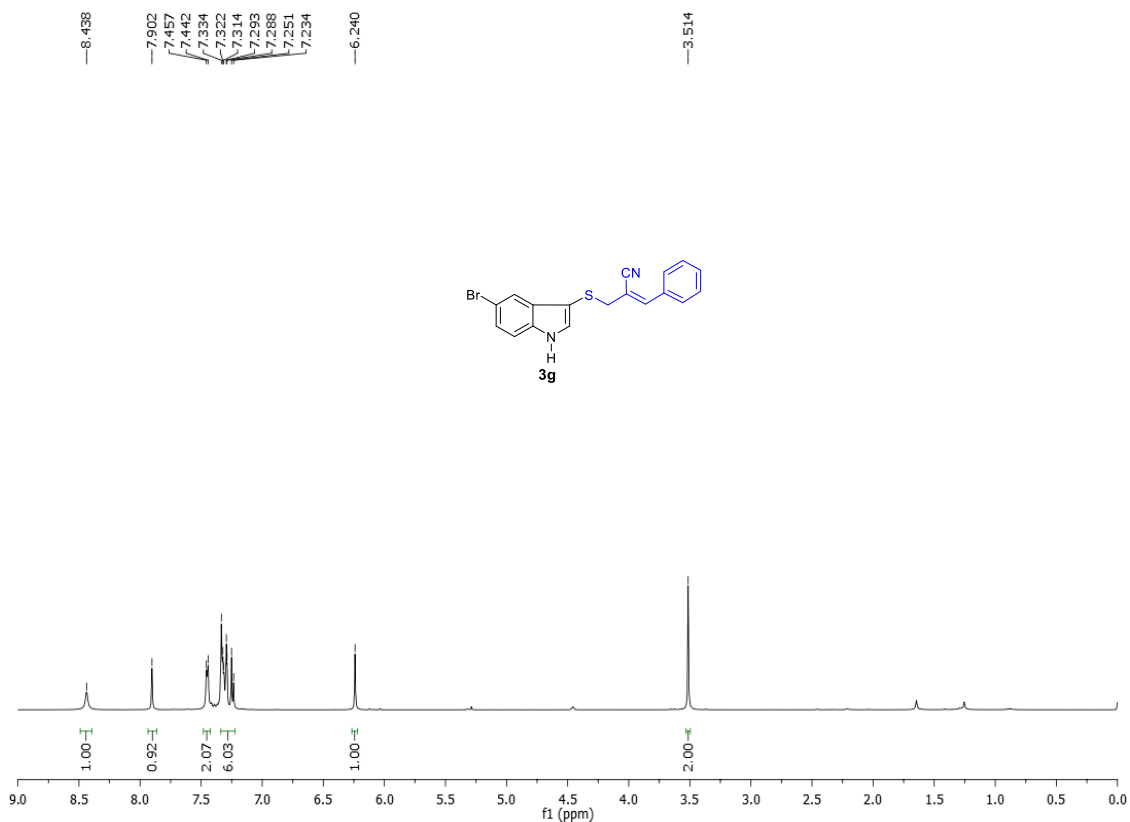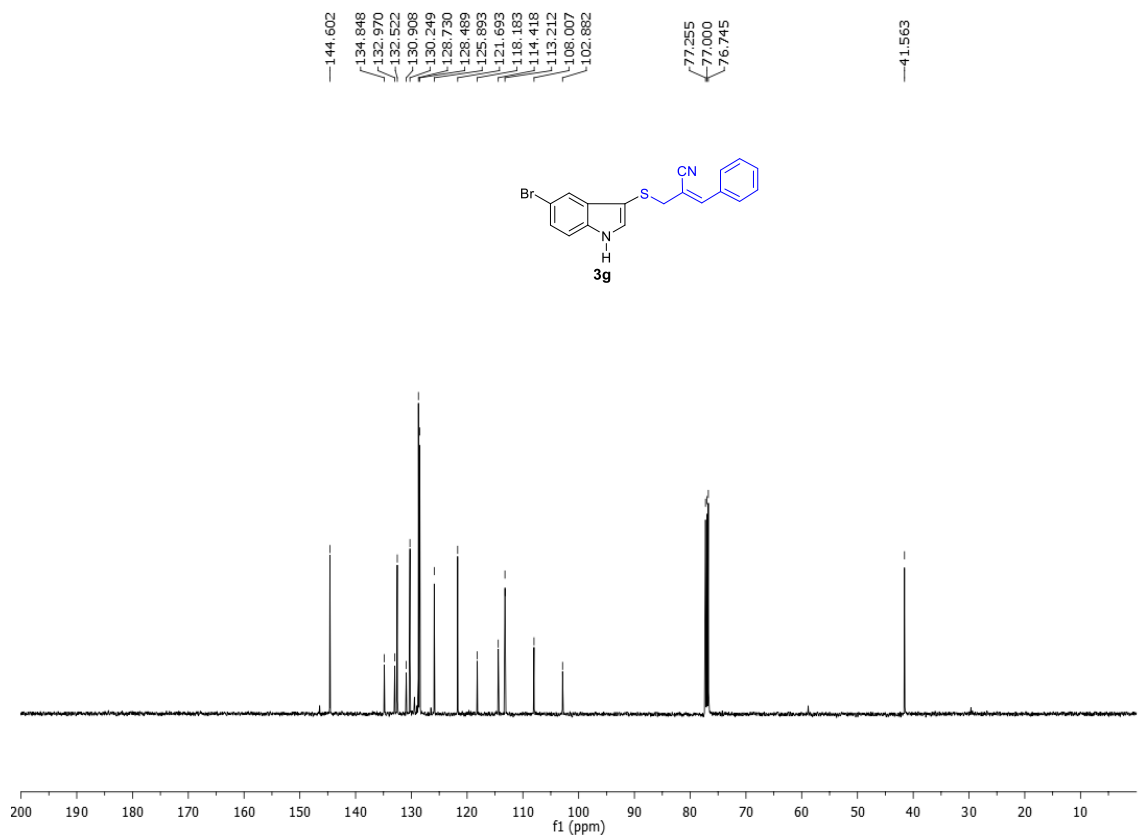

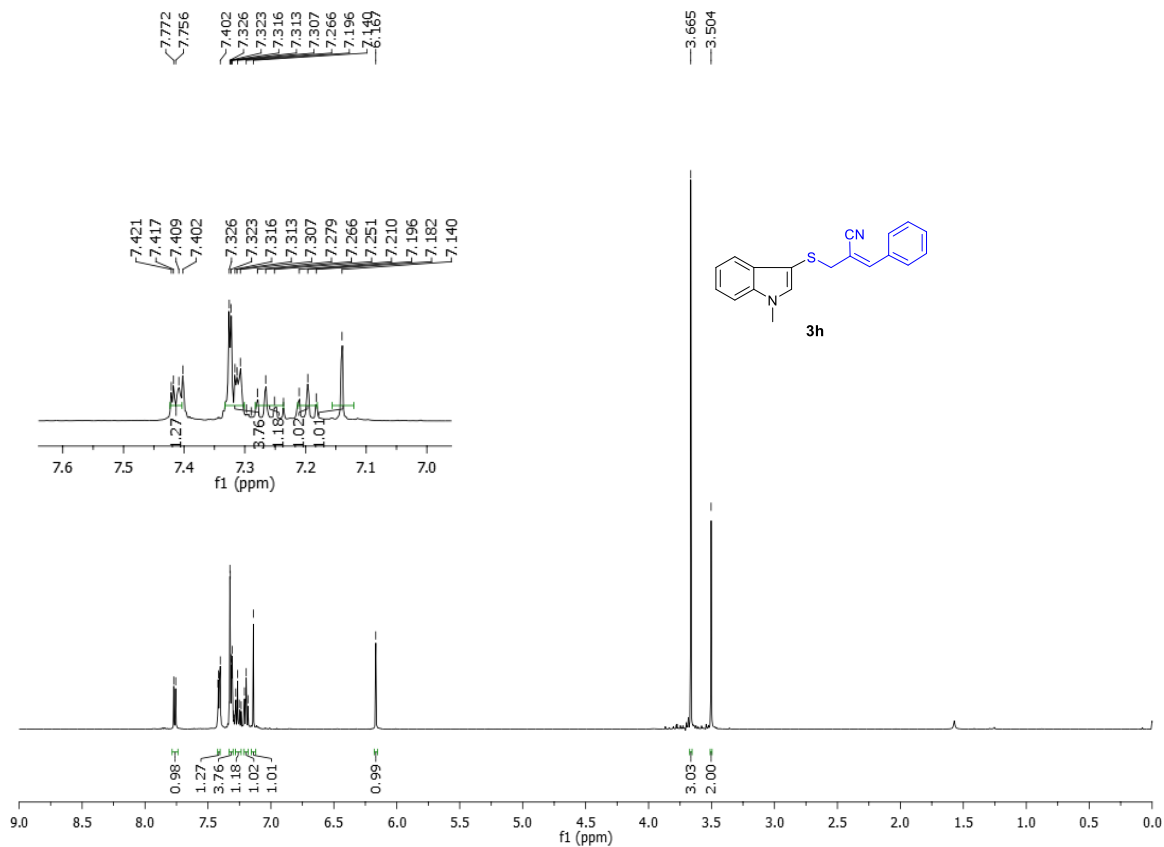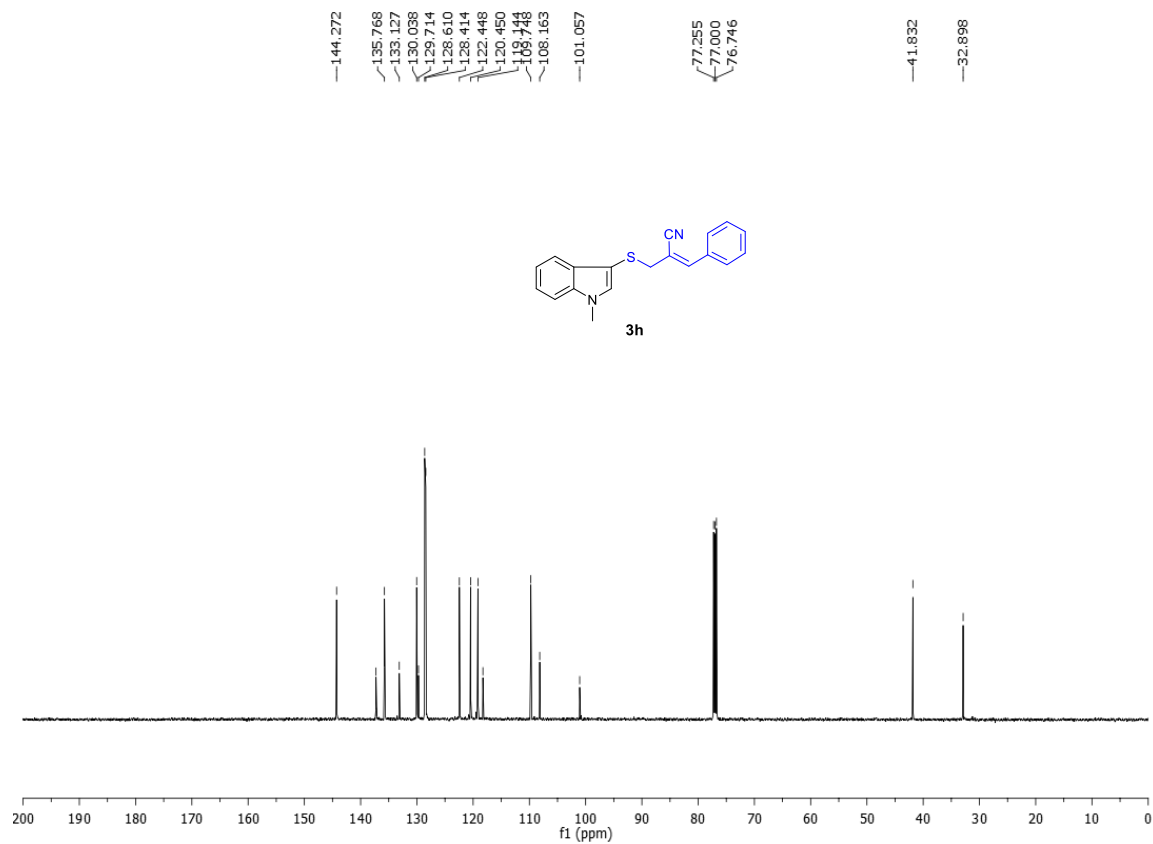

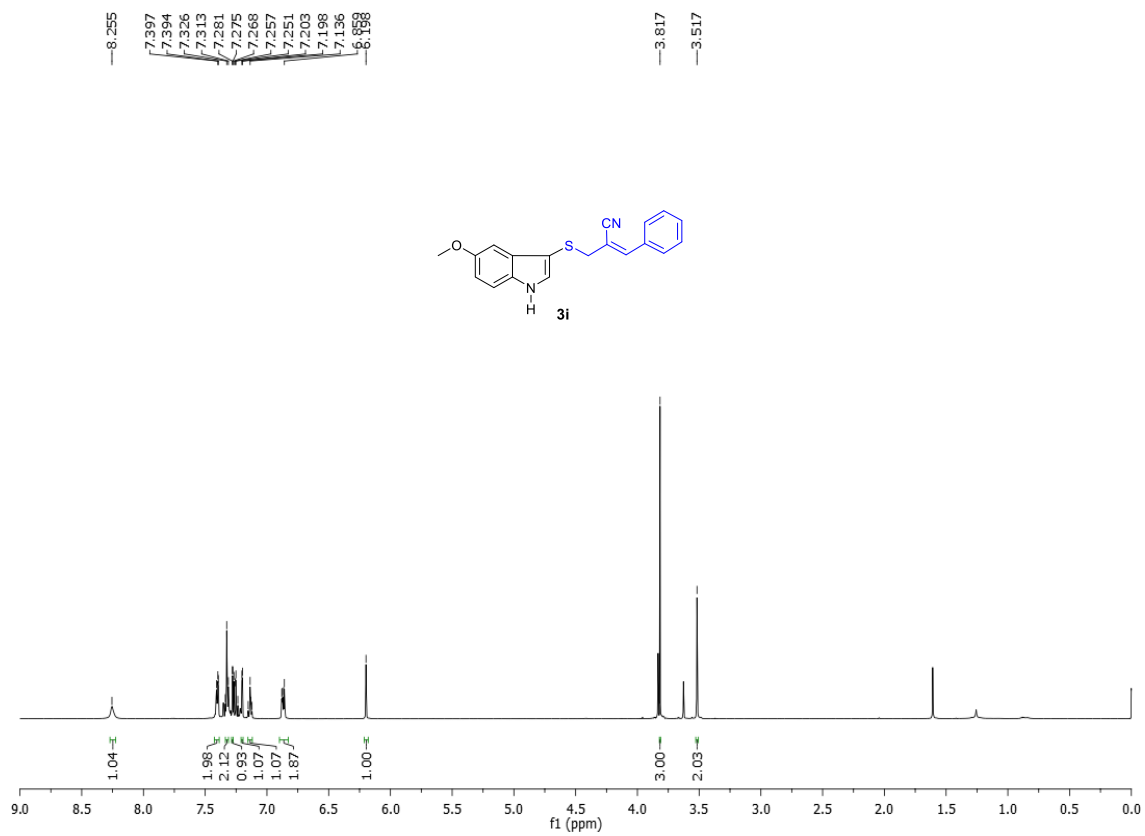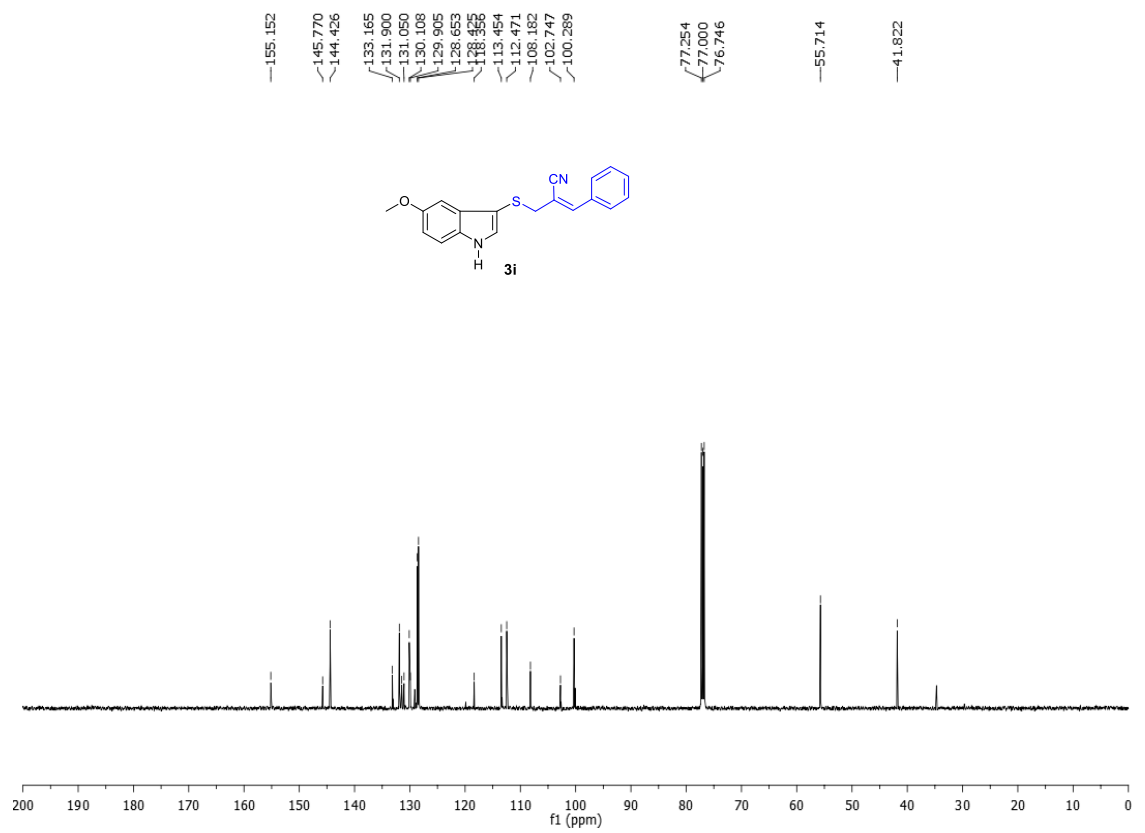

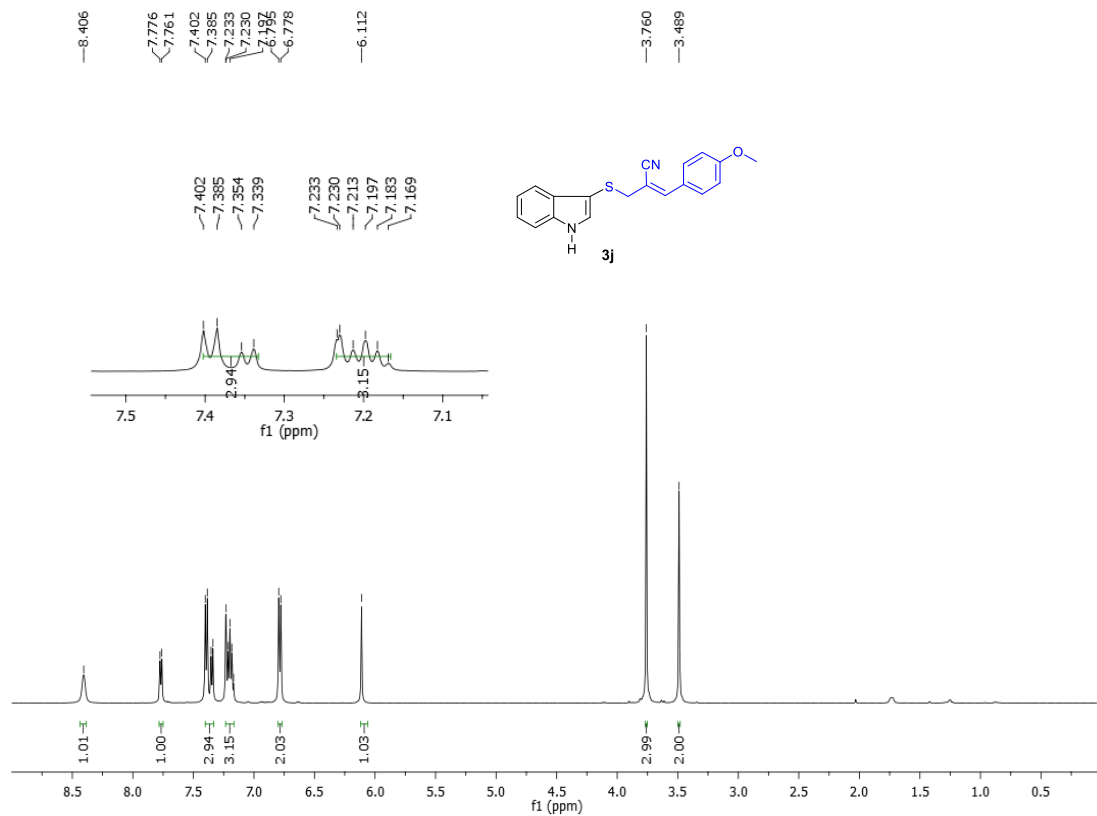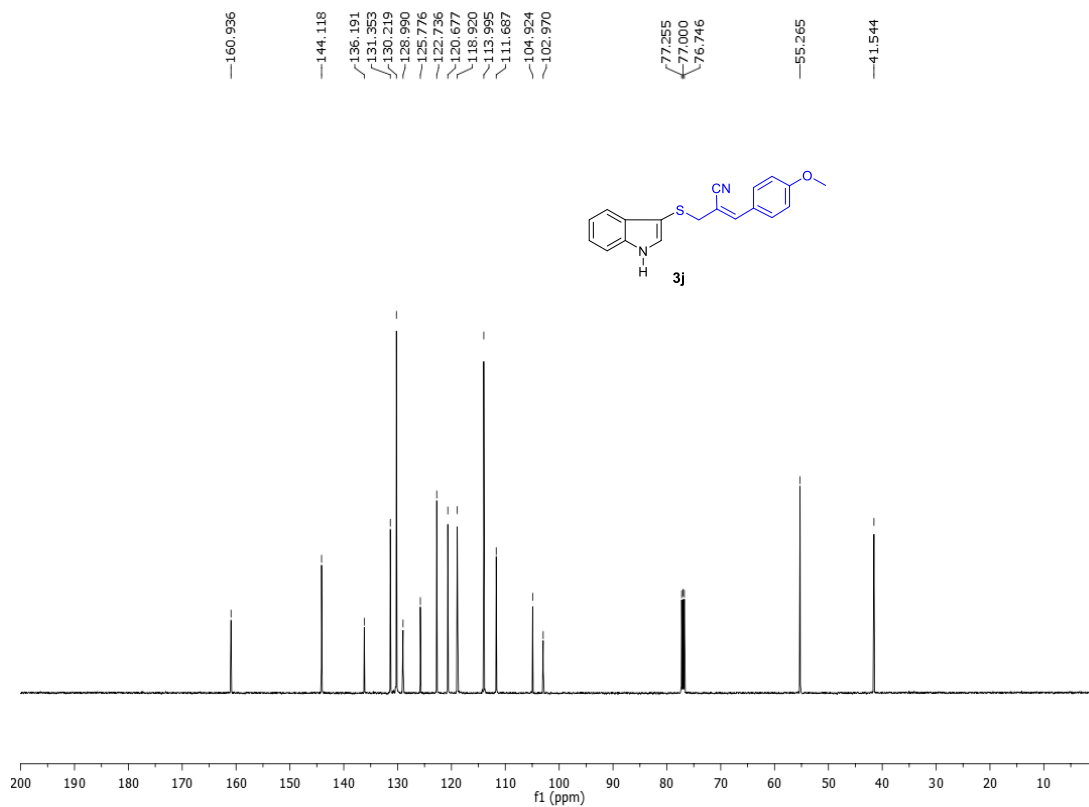

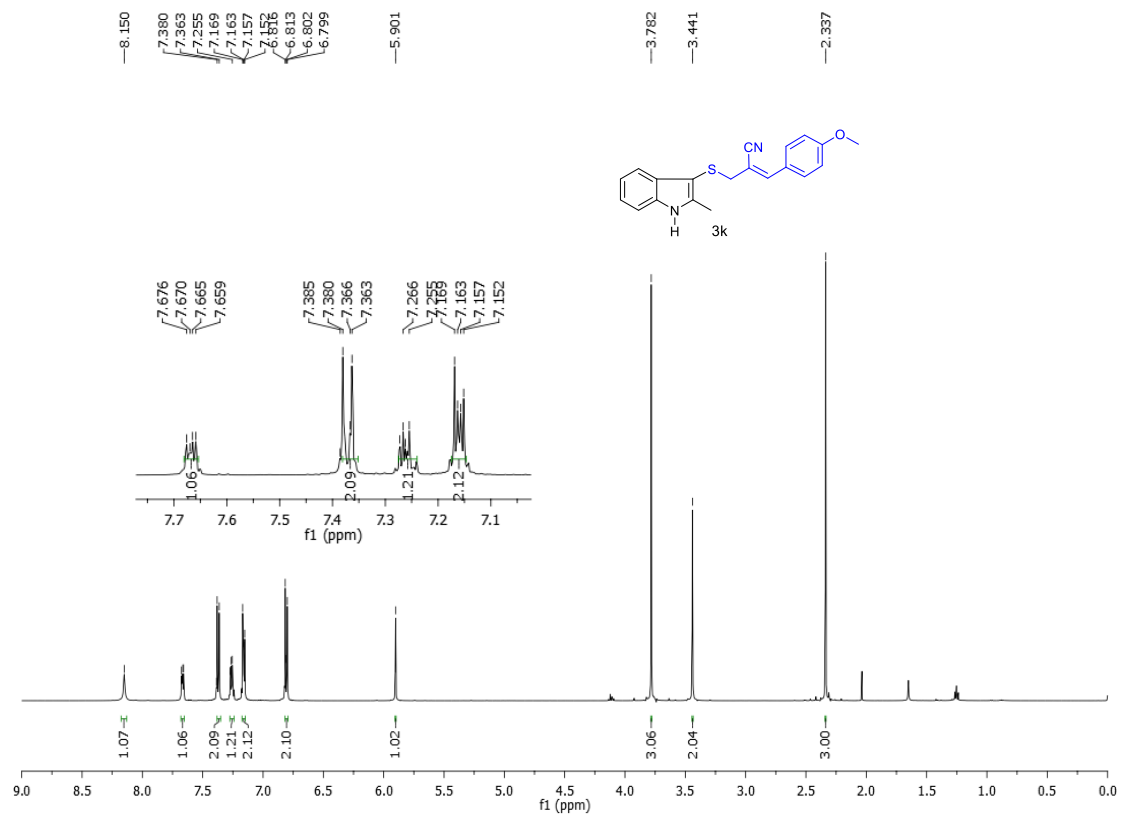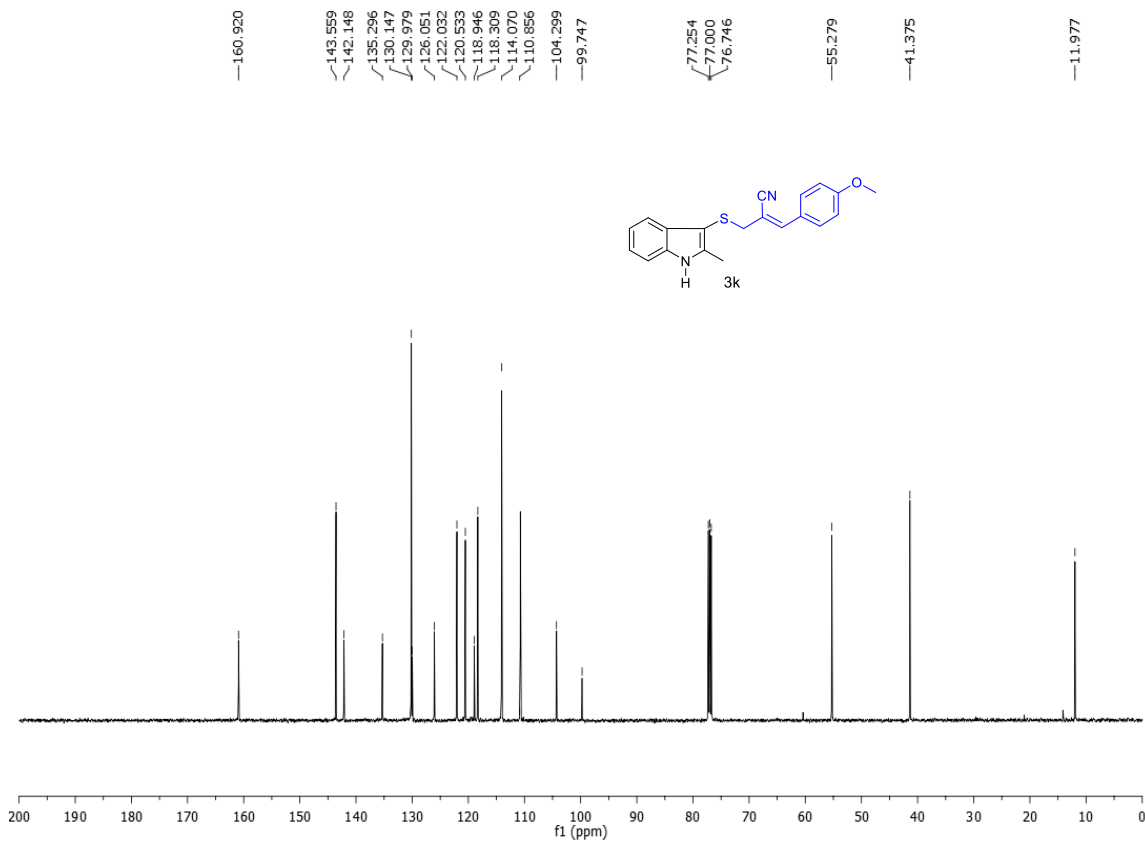



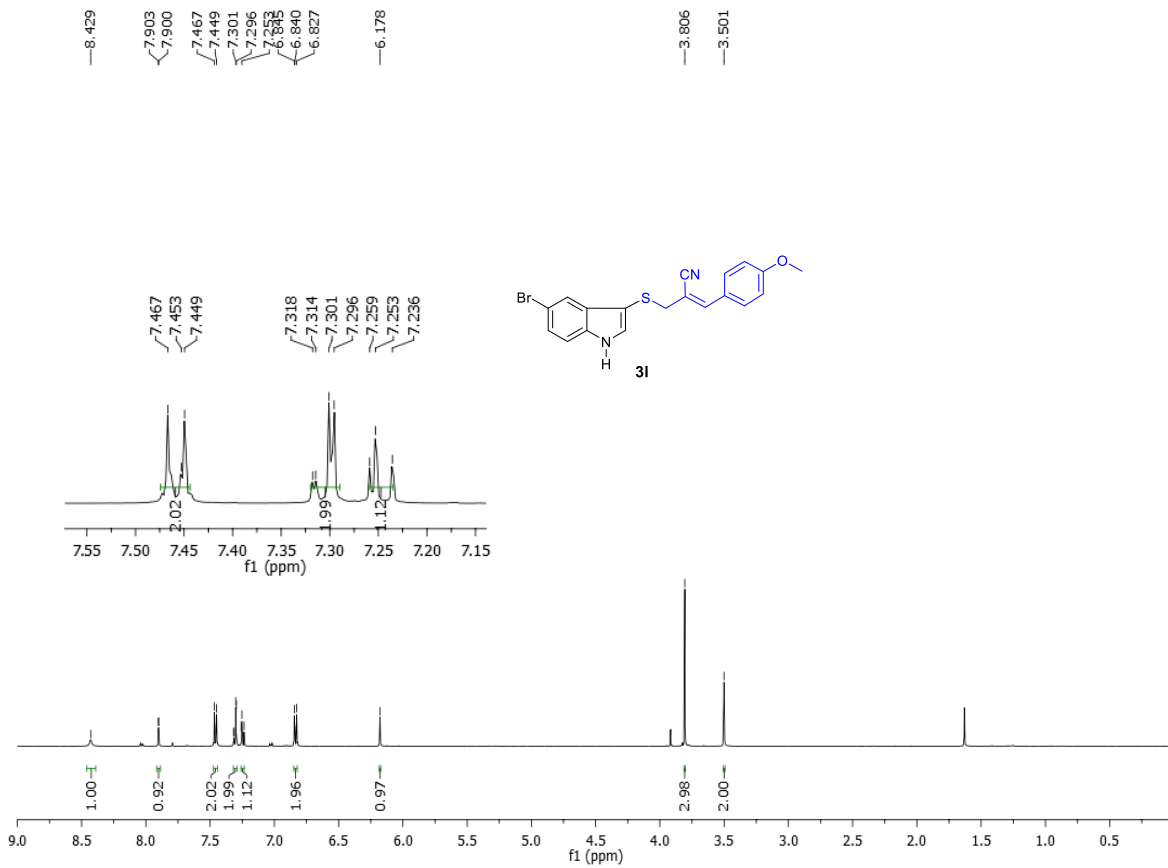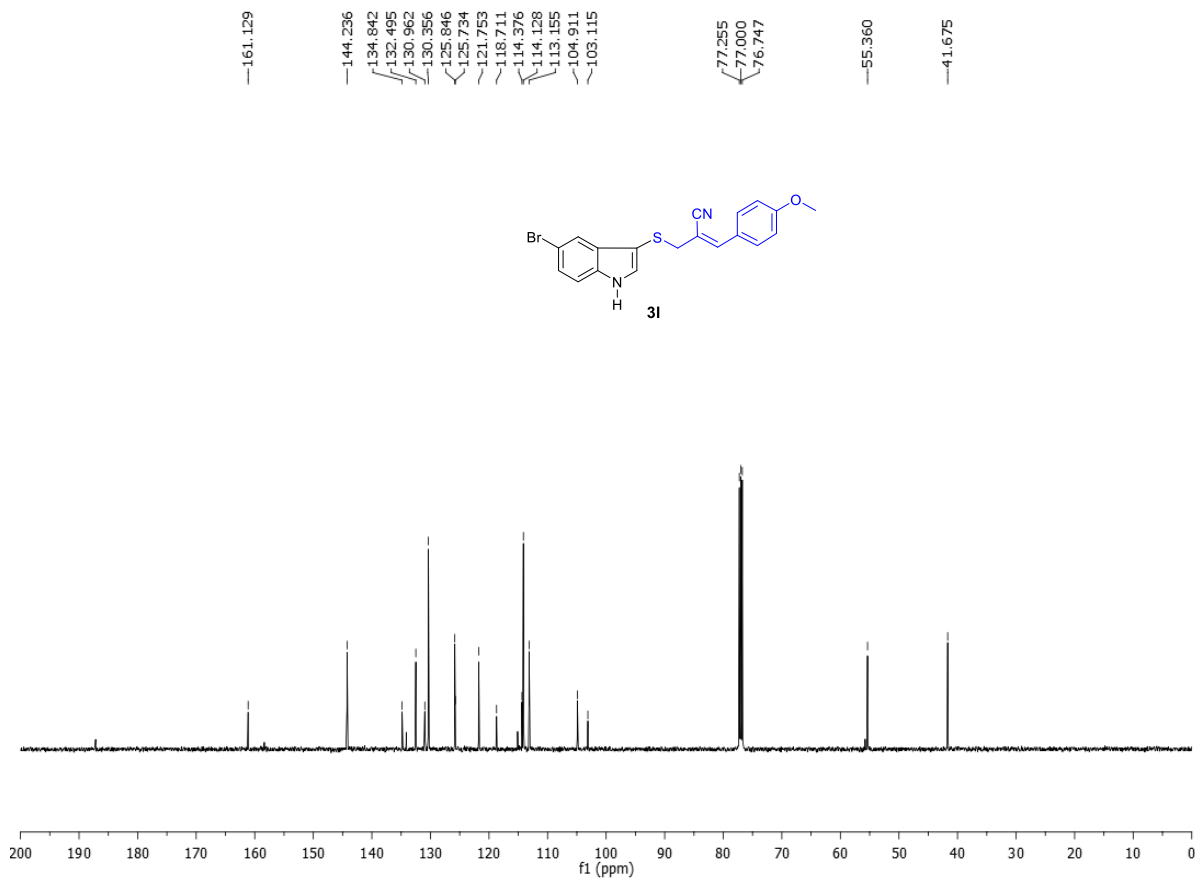

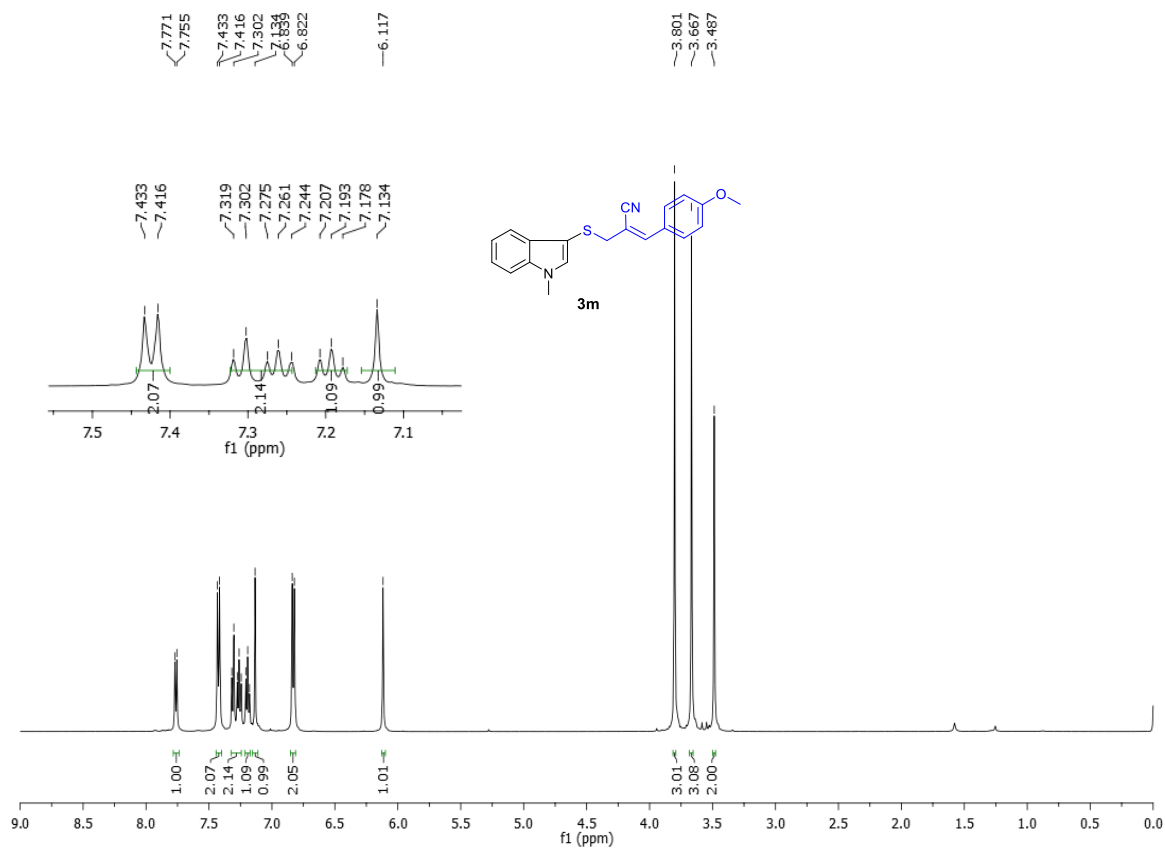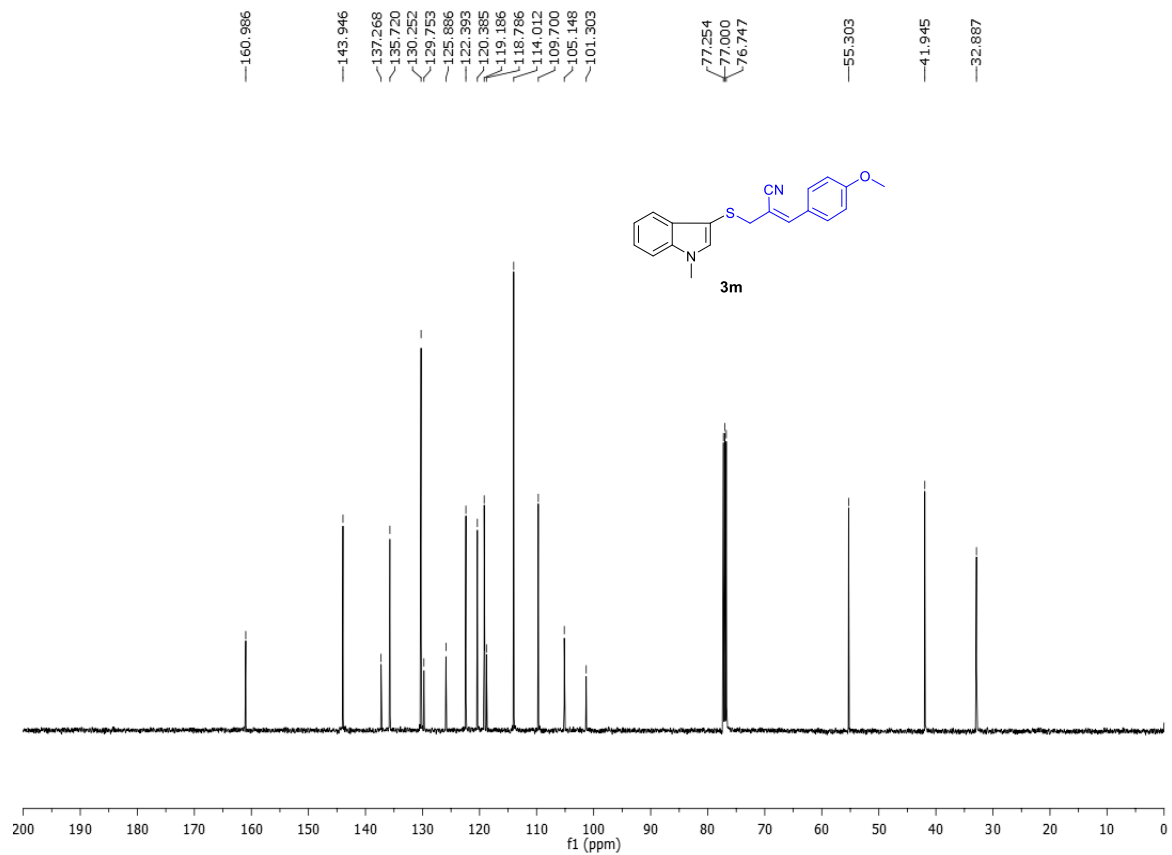

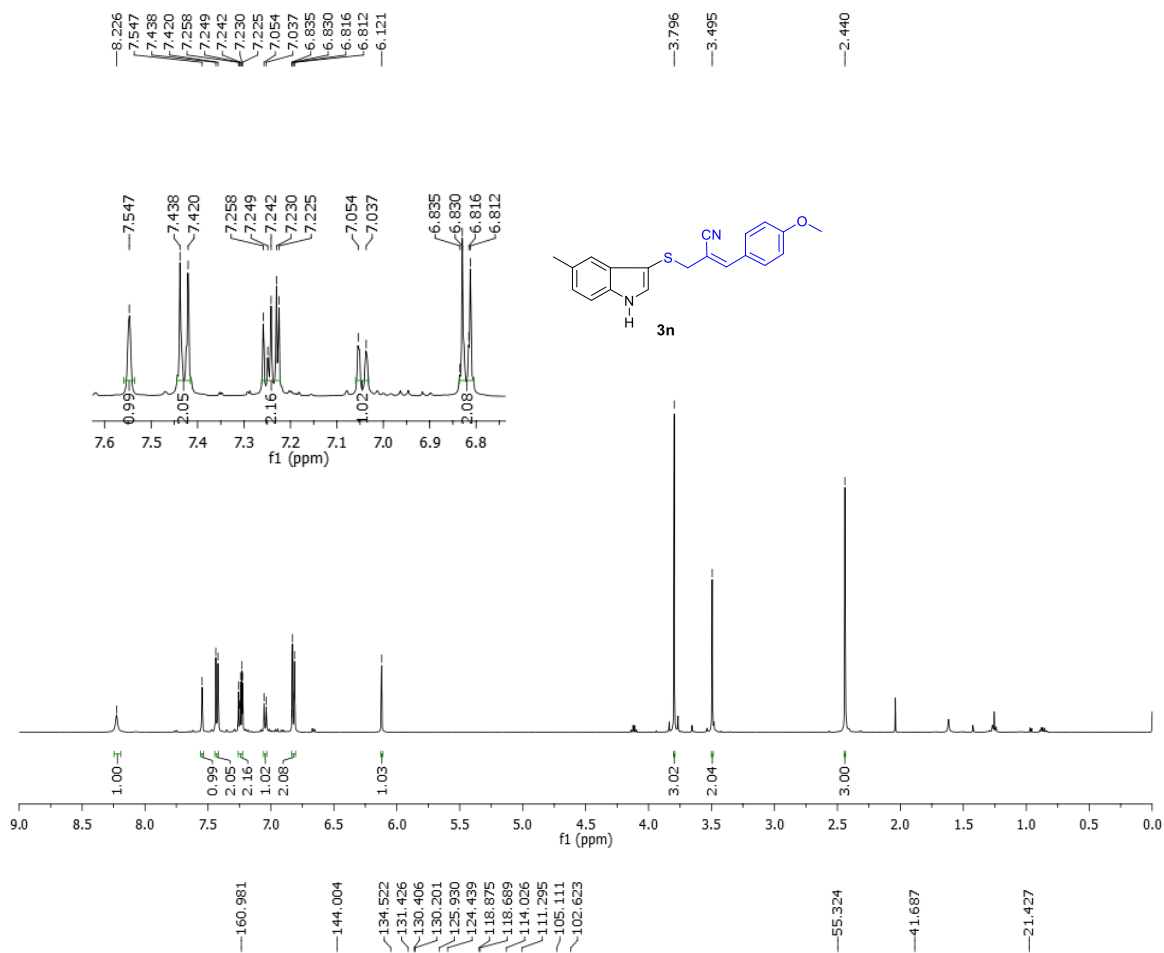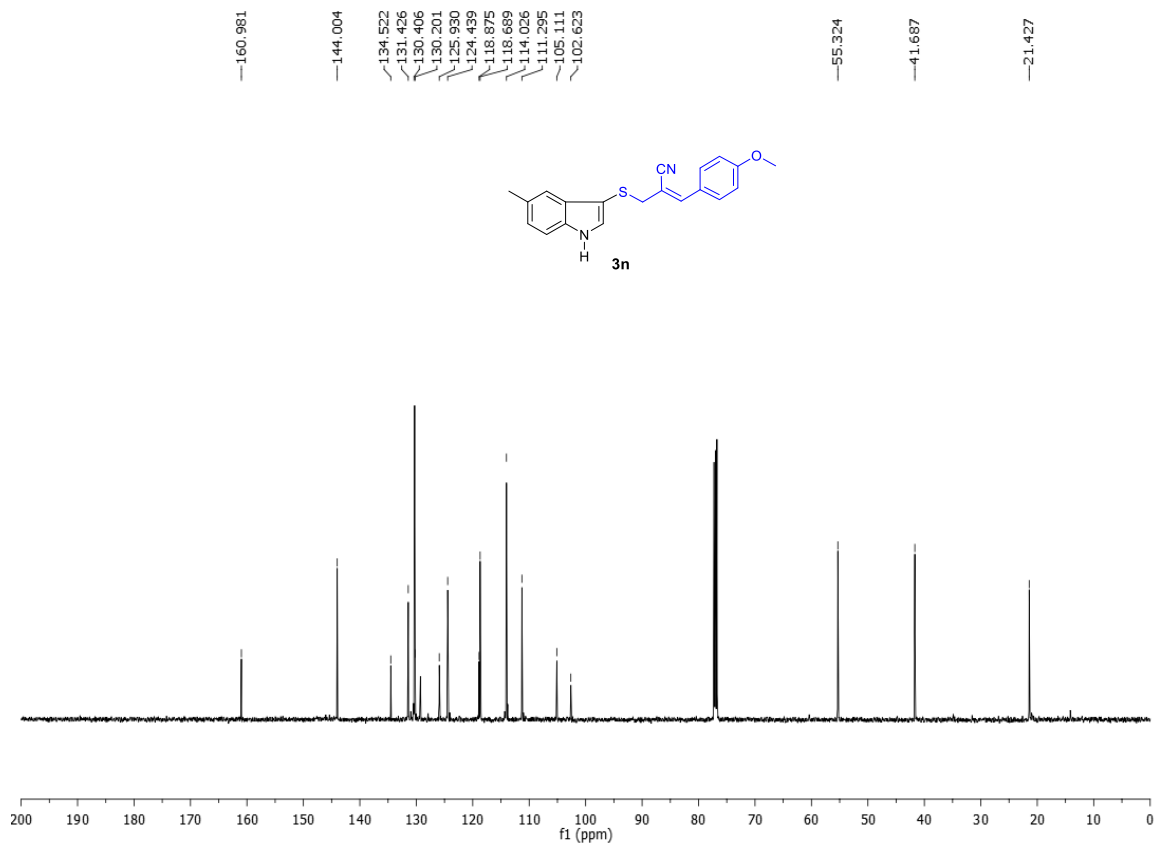

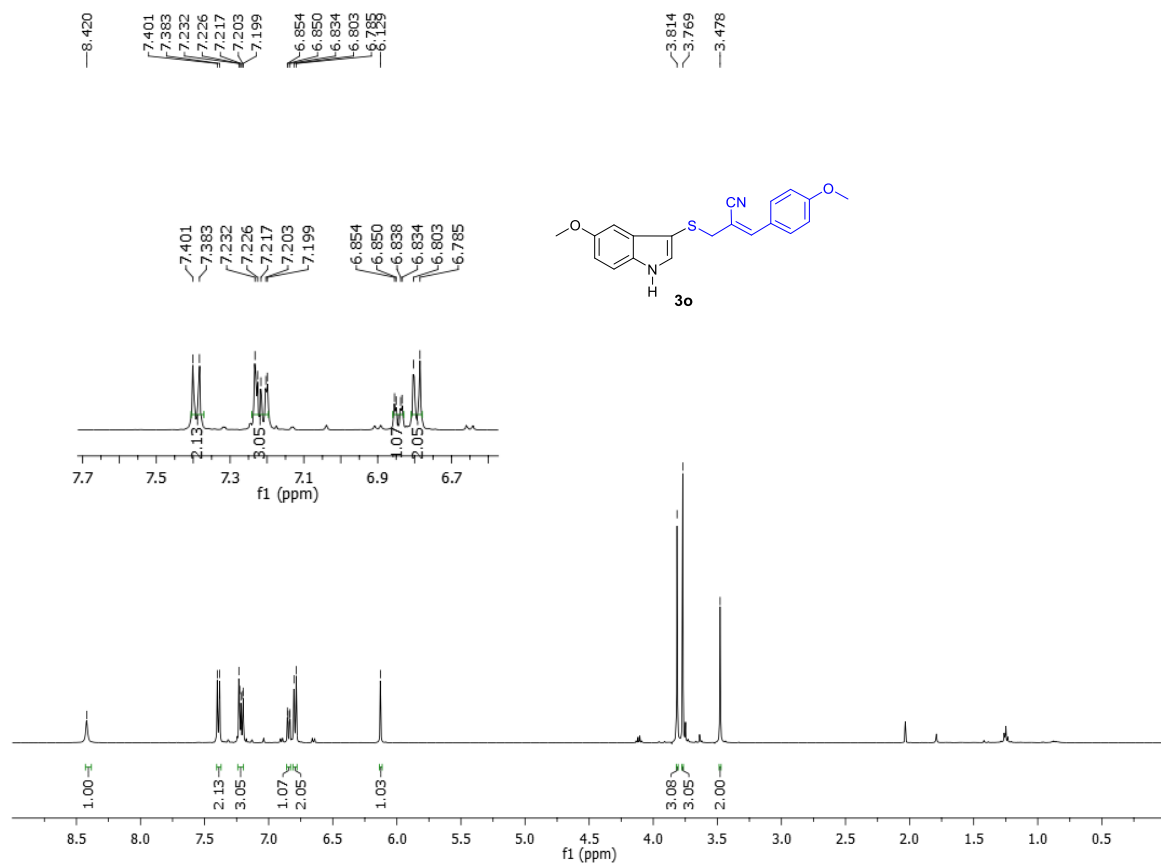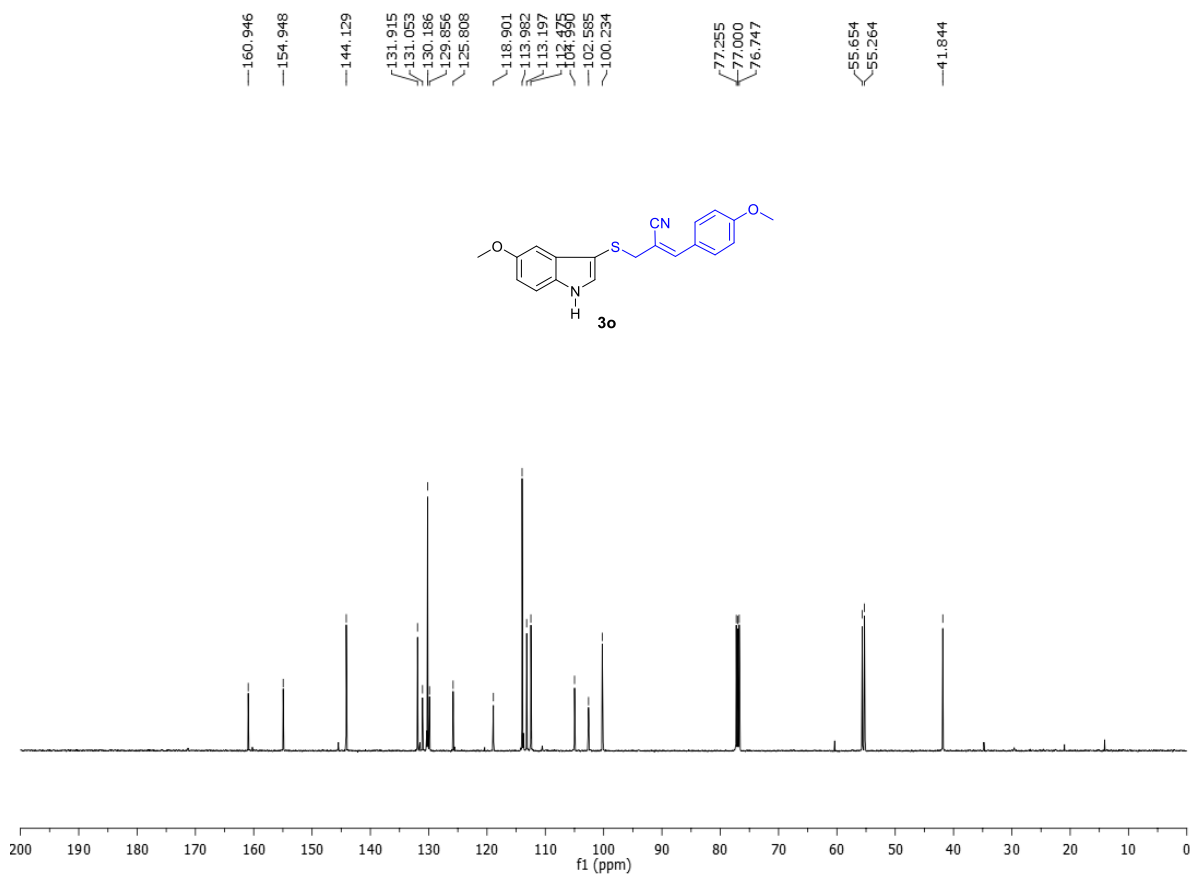

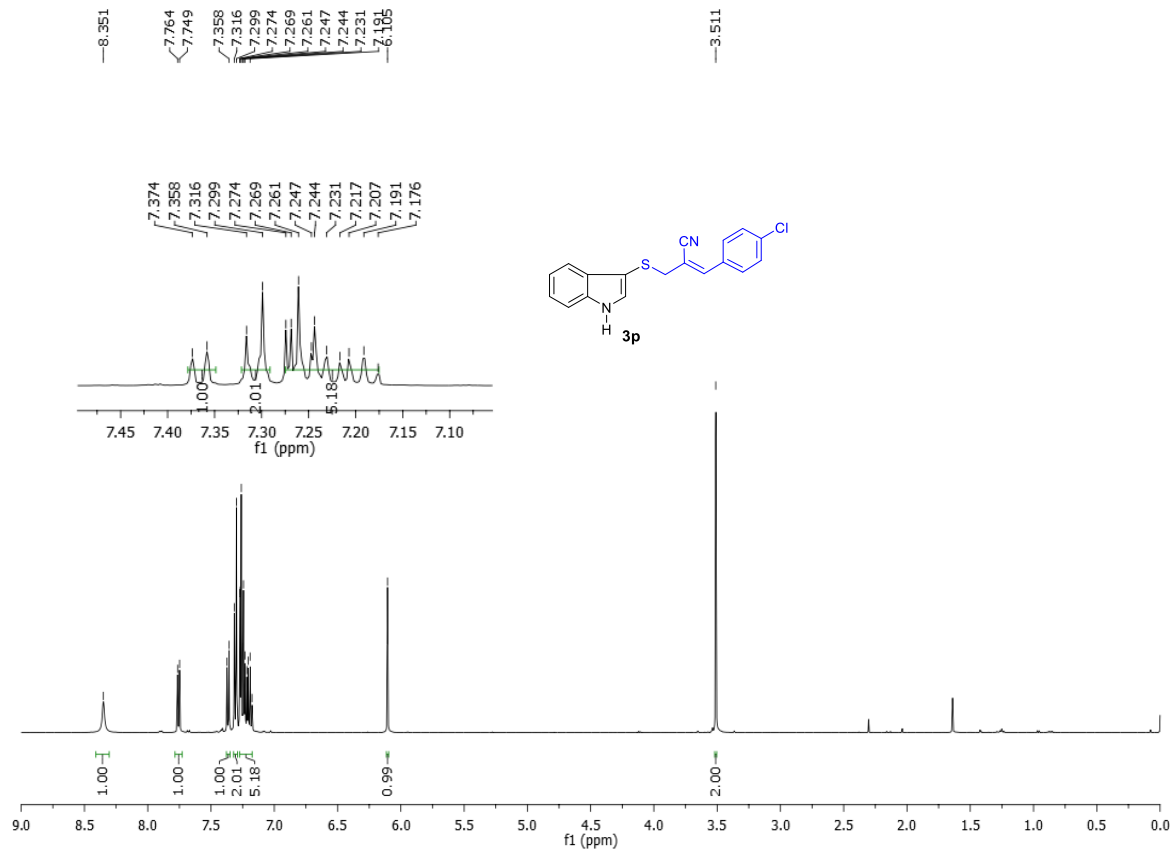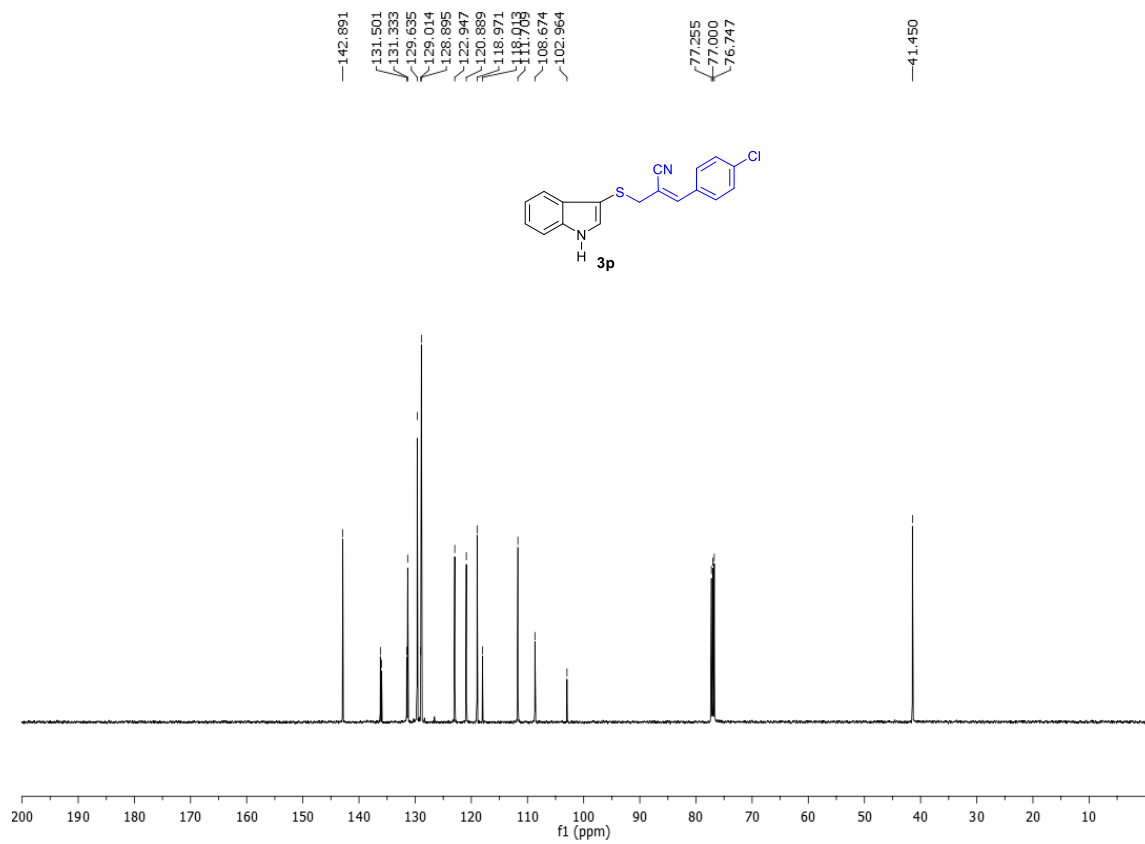

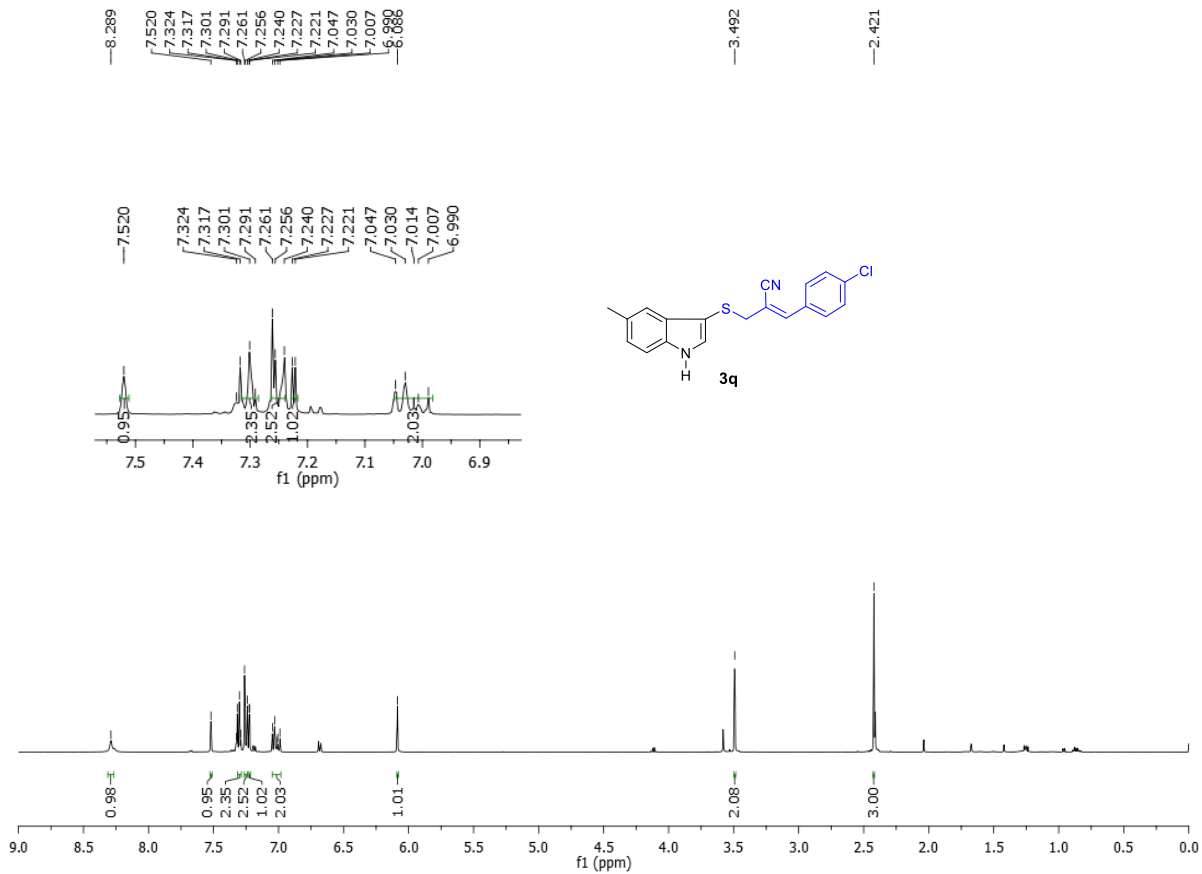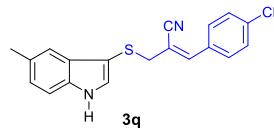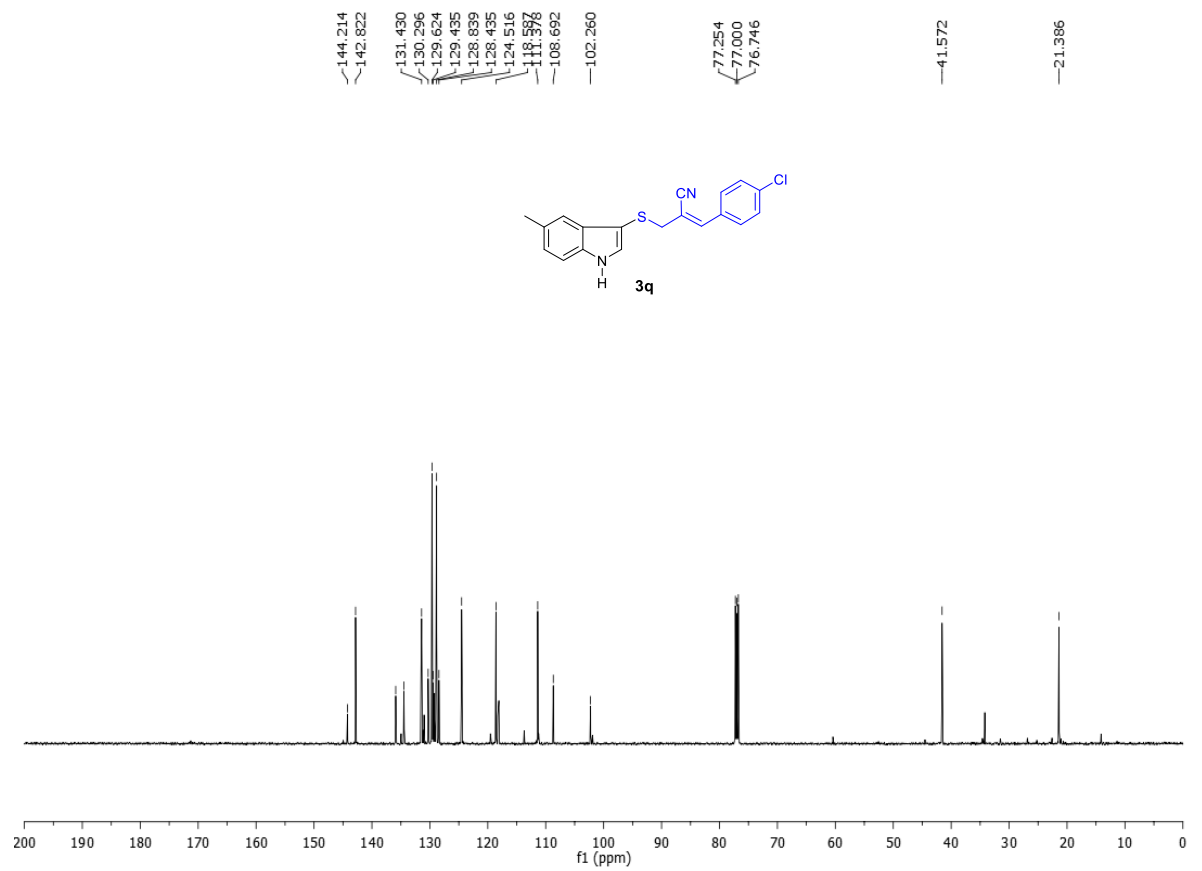

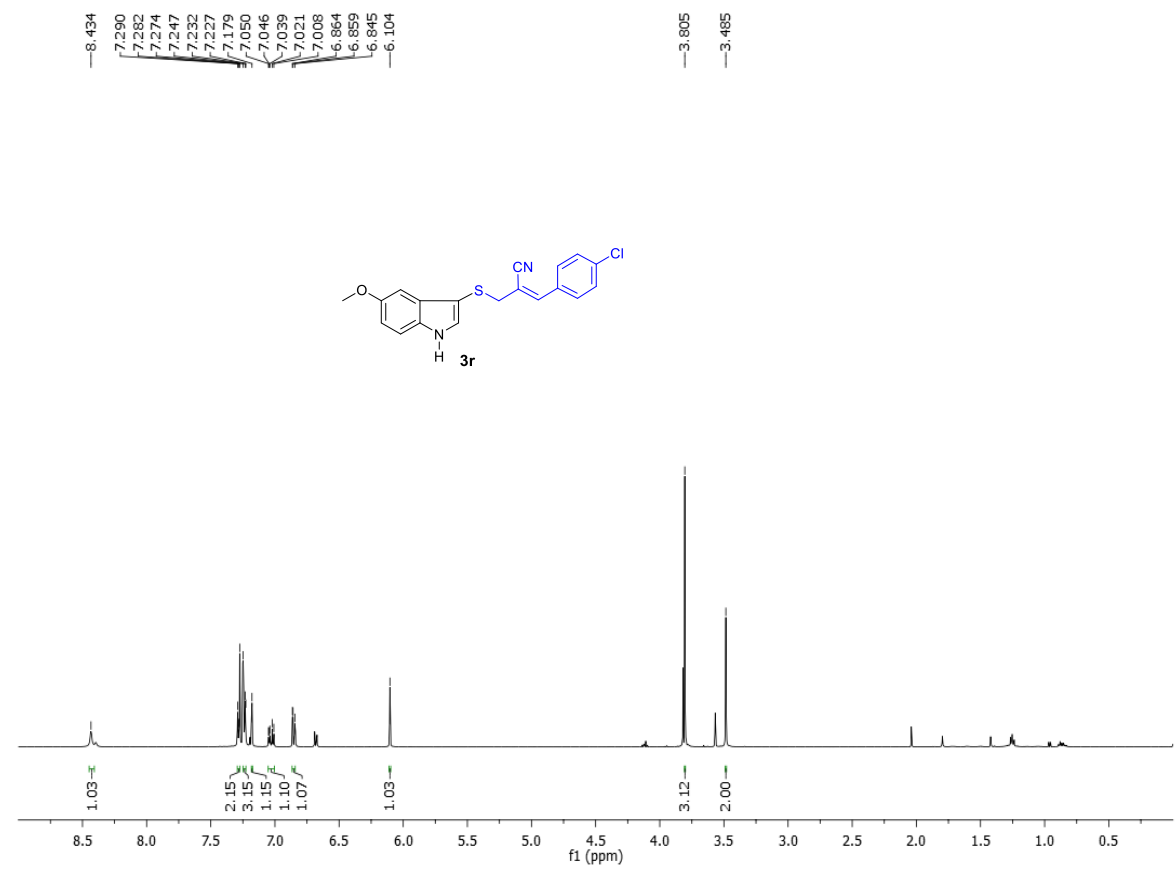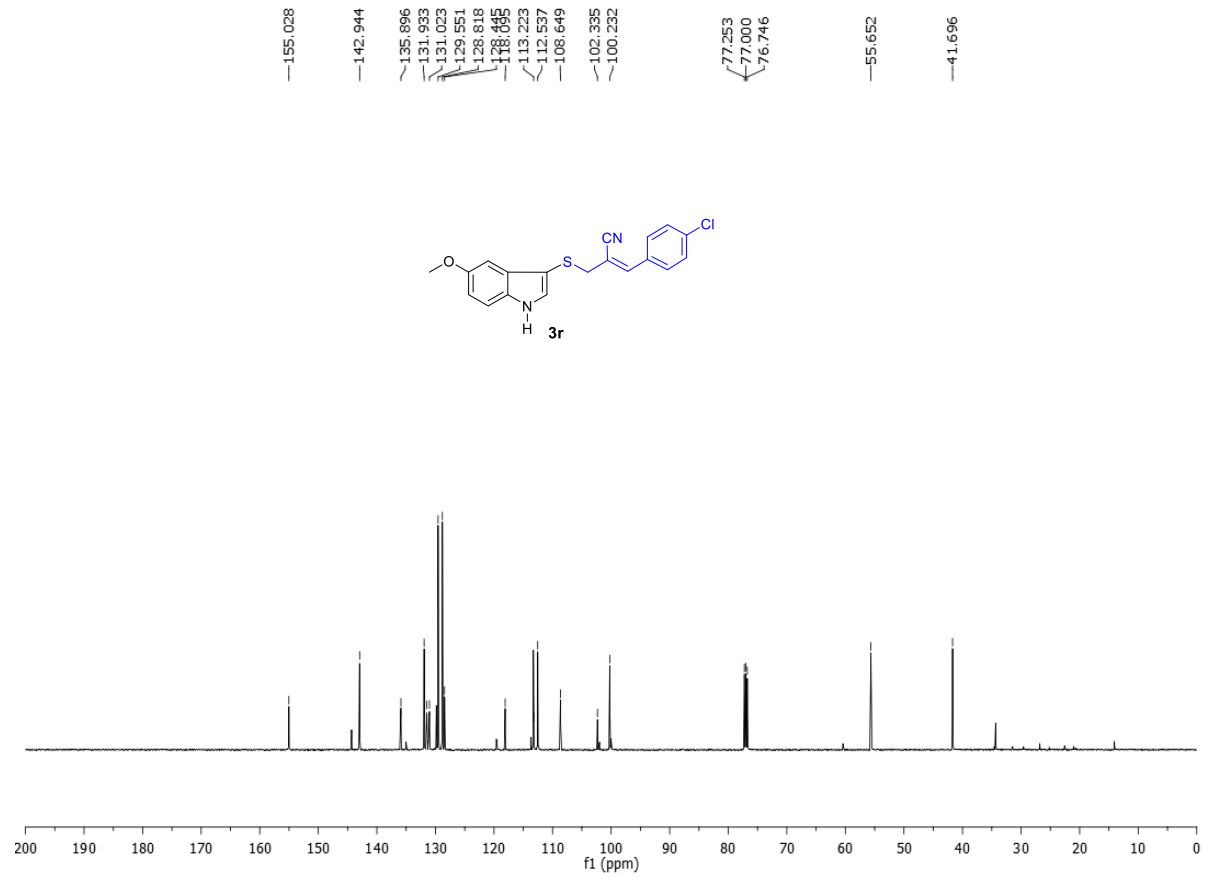

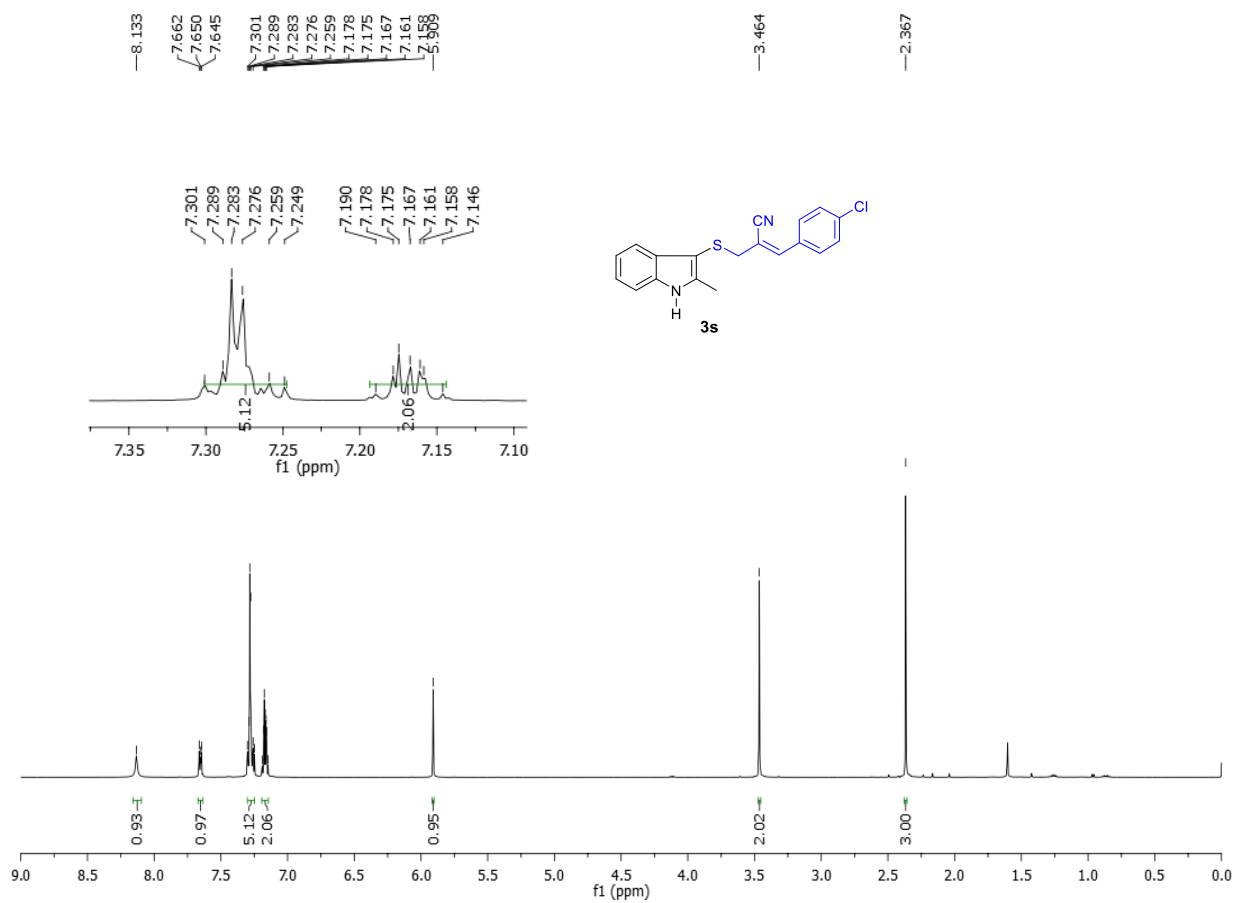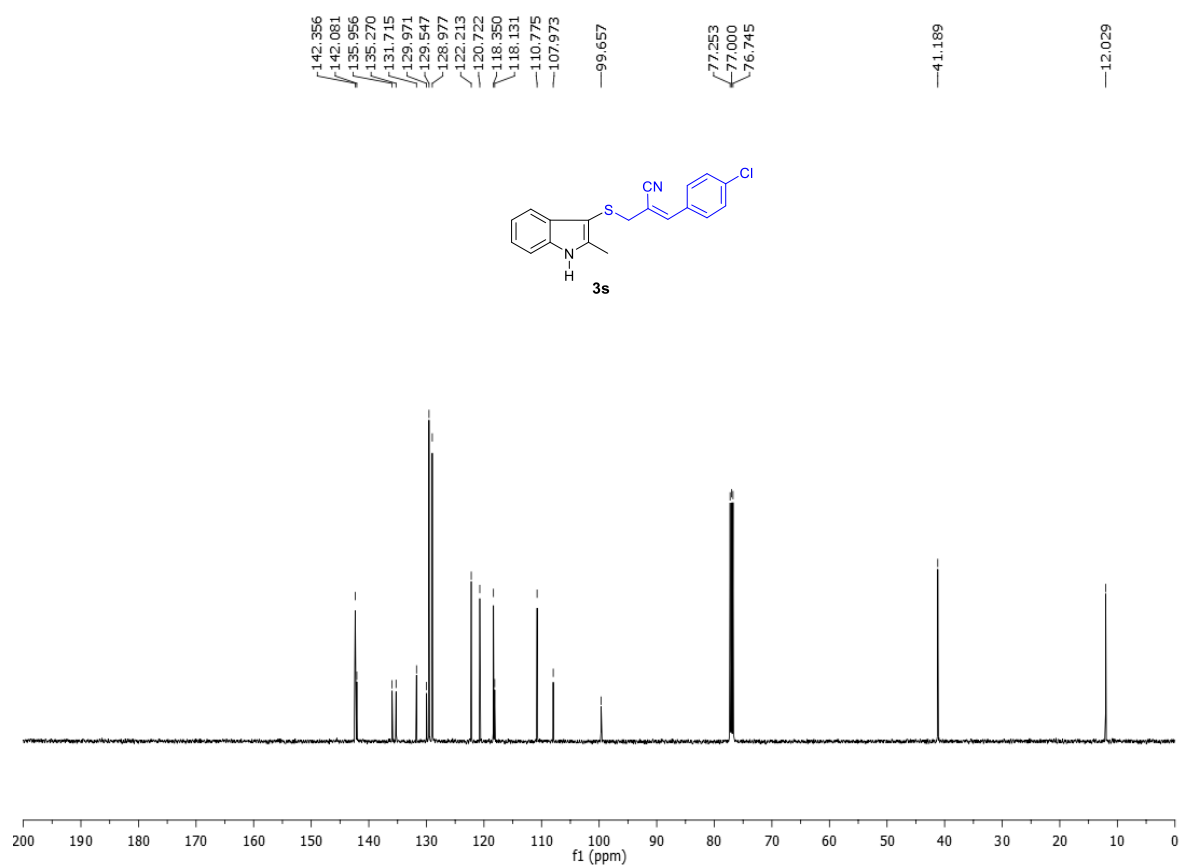



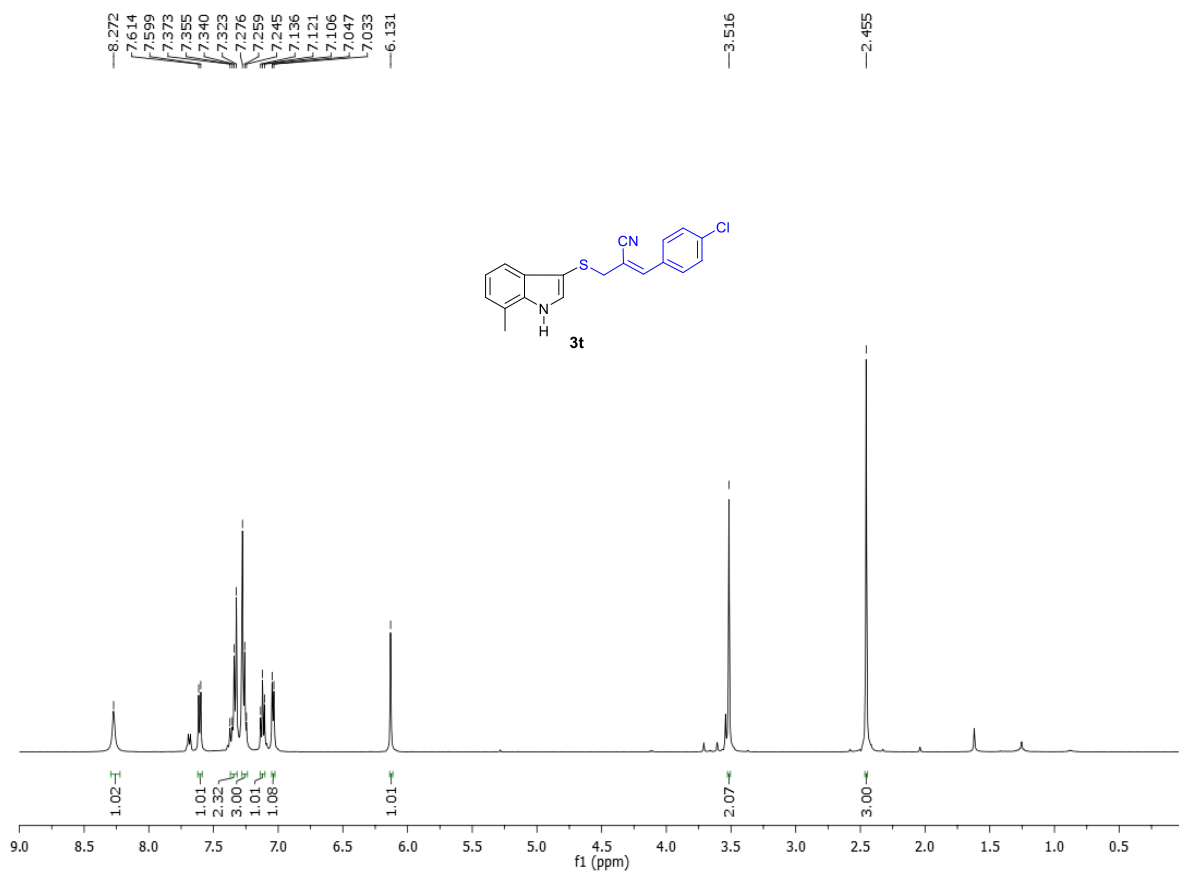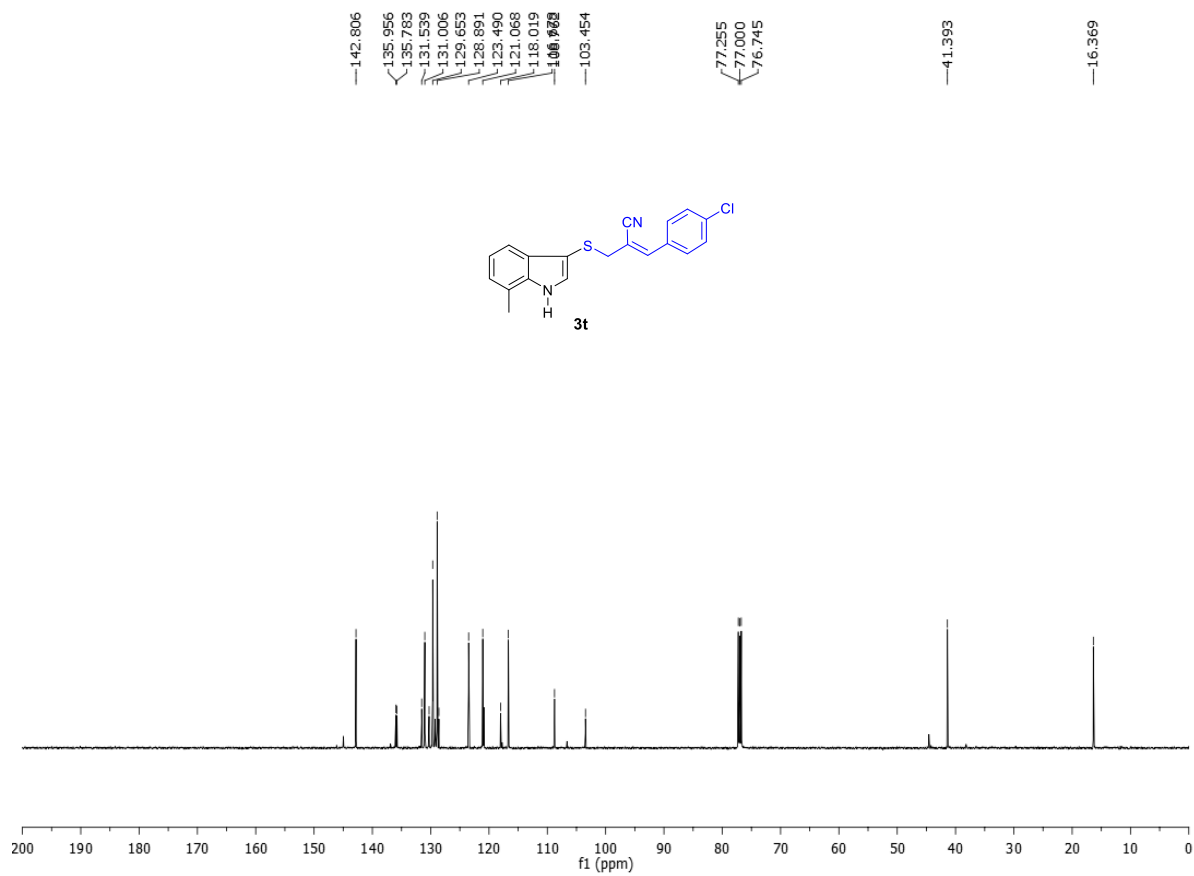

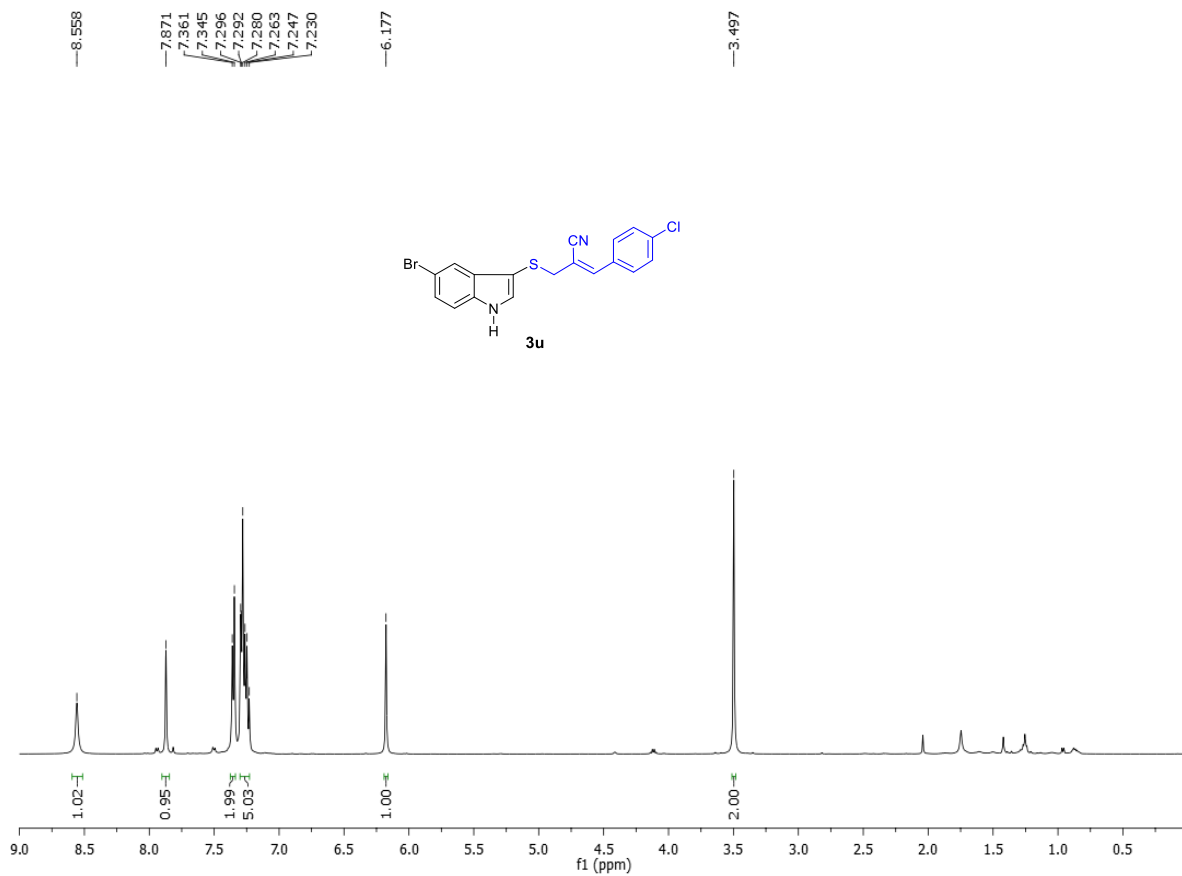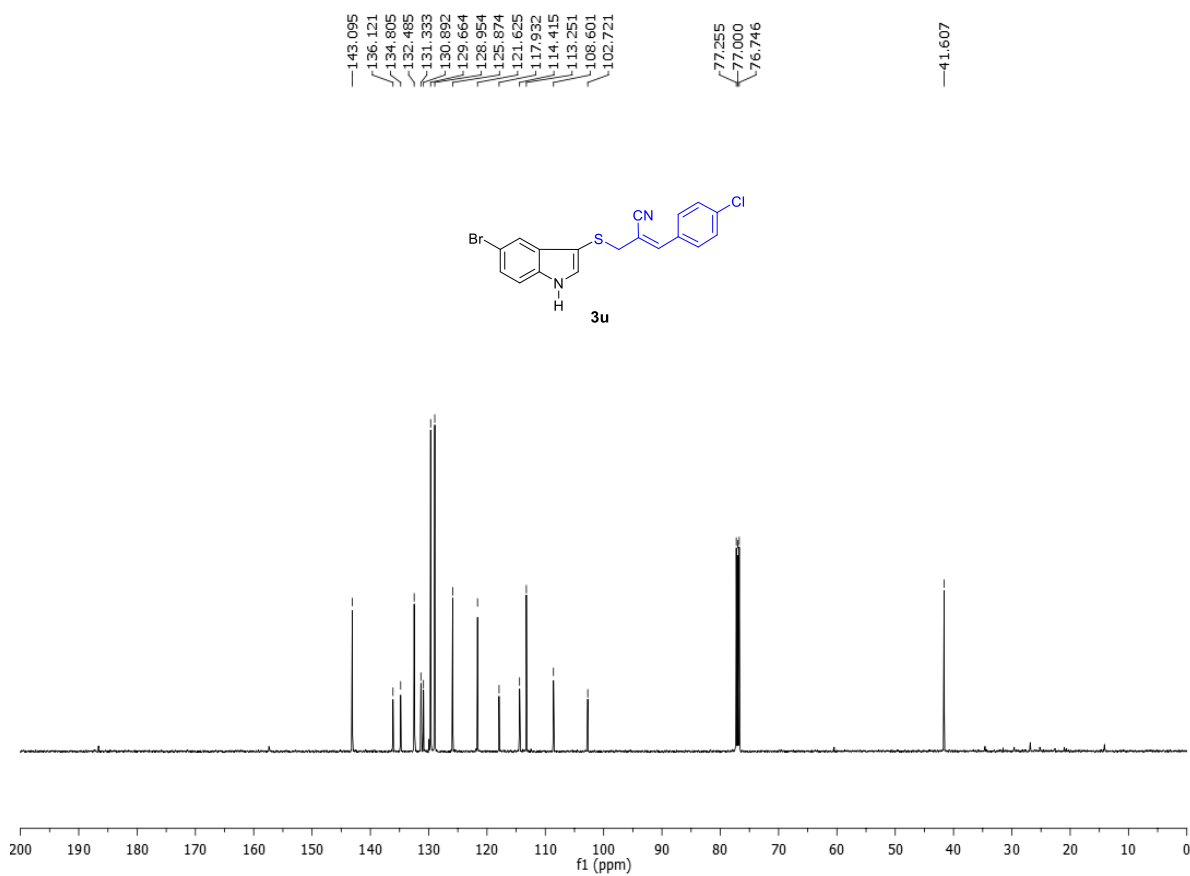

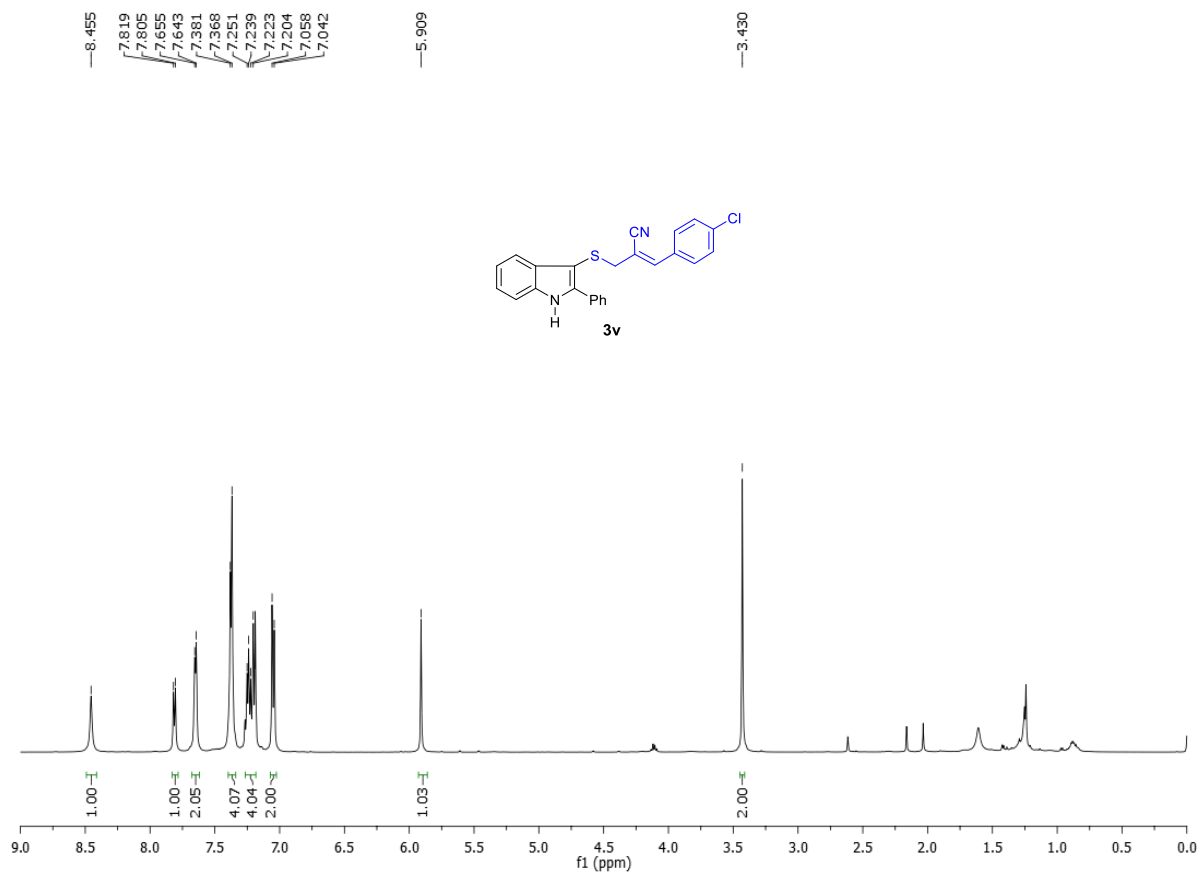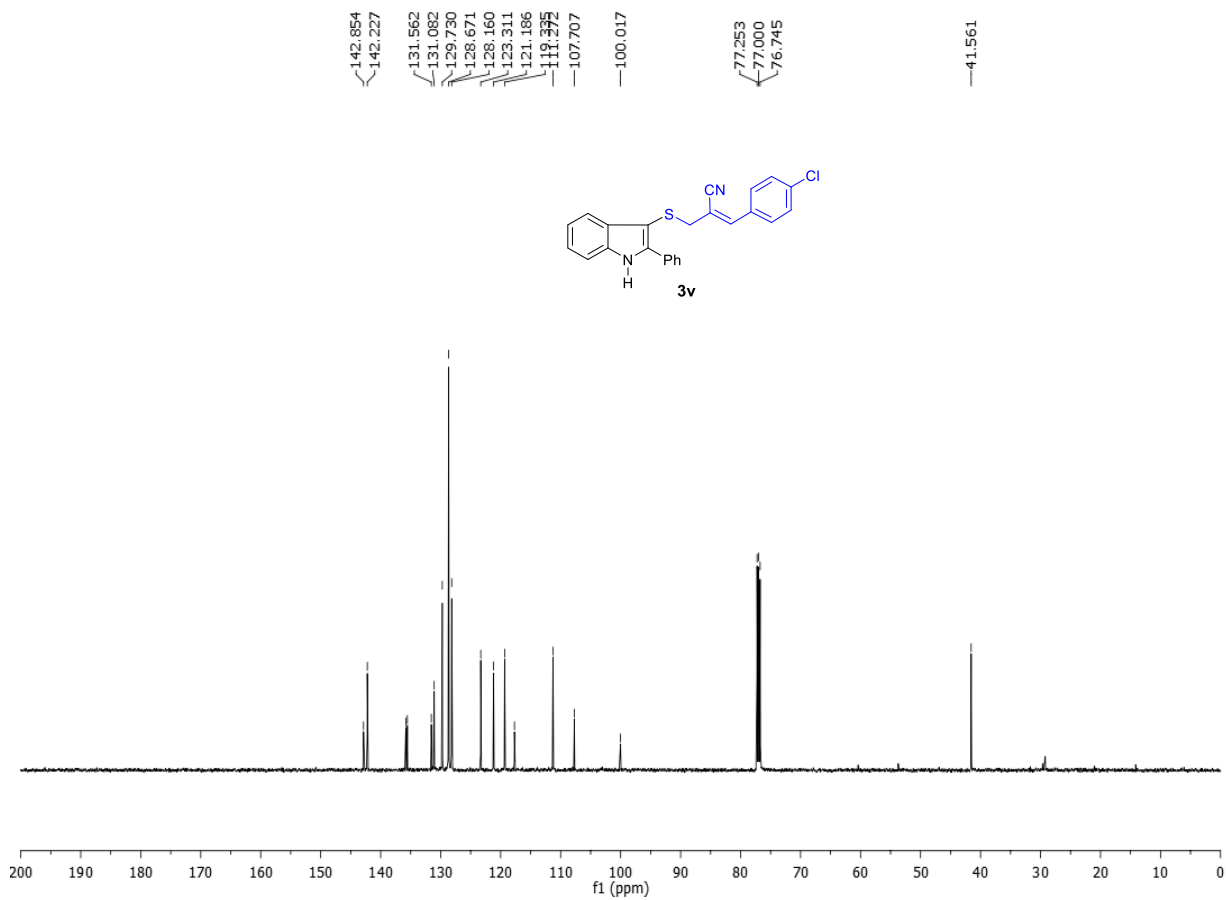

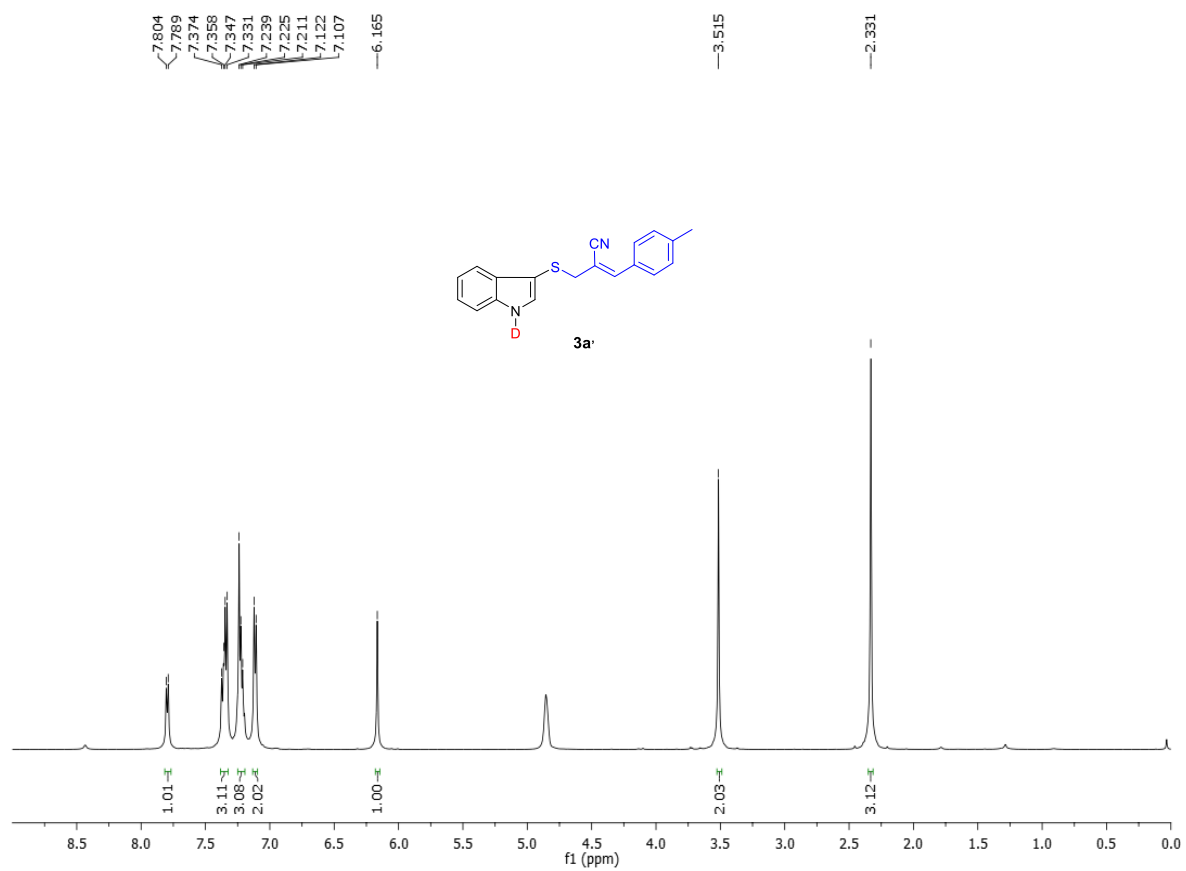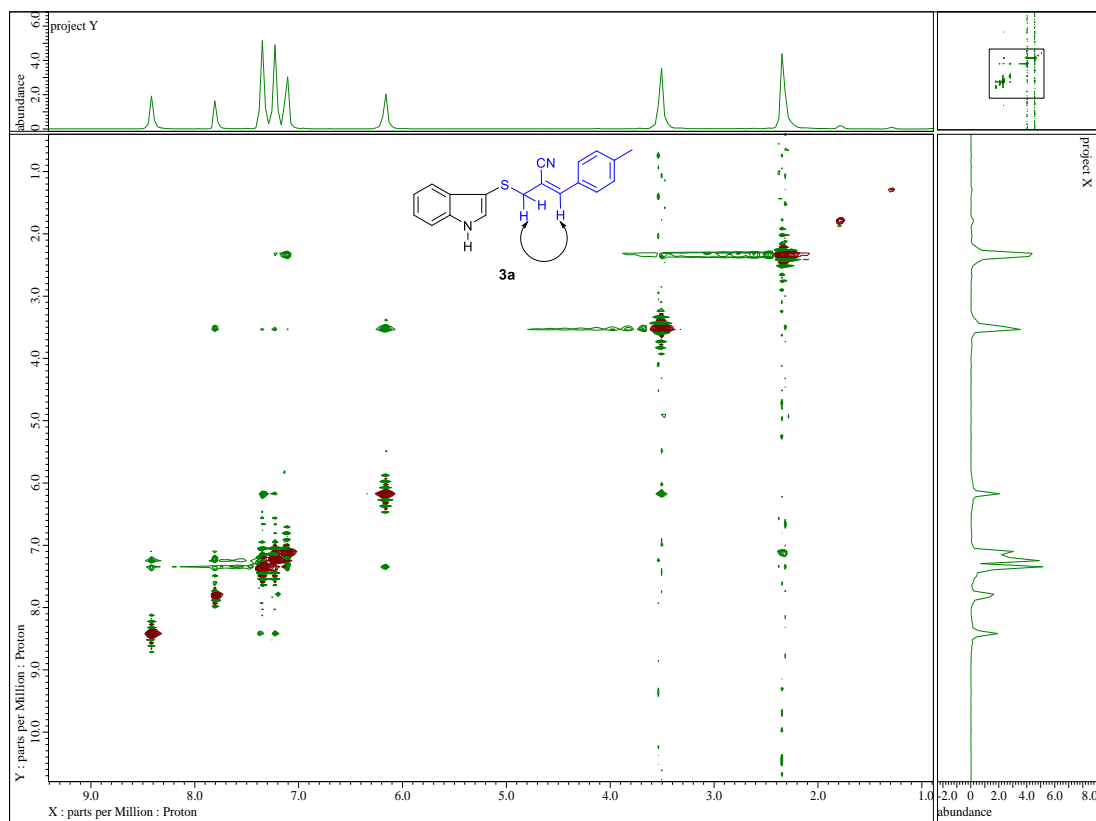

Supplement: d1ob00377a1.pdf [file d1ob00377a1.pdf]
